# Supplementary material
Source: PubMed Central journal article supplement (PMC4917199)
Supplement: NIHMS788792-supplement-Supplemental.pdf [file NIHMS788792-supplement-Supplemental.pdf]

# Elucidating the Molecular Composition of Cartilage by Proteomics

*Ming-Feng Hsueh<sup>1,3</sup>, Areej Khabut<sup>4</sup>, Sven Kjellström<sup>5</sup>, Patrik Önnerfjord<sup>4</sup>, Virginia Byers  
Kraus\*<sup>1,2</sup>*

<sup>1</sup>Duke Molecular Physiology Institute, Departments of <sup>2</sup>Medicine and <sup>3</sup>Pathology, Duke University School of Medicine, Duke University, Durham, NC 27701; Department of <sup>4</sup>Clinical Sciences Lund, Section of Rheumatology and Molecular Skeletal Biology and <sup>5</sup>Department of Biochemistry and Structural Biology, Center for Molecular Protein Science, Lund University, Lund, Sweden

## **Supporting information**

Figure S1. Gene ontology classification of total proteins from cartilage by guanidine-HCl extraction.

Table S1. Peptide sequence, transitions, and collision energy for MRM

Table S2: Quantification results of MRM experiments

Table S3: Less abundant proteins identified from guanidine-HCl extraction

Table S4: Proteins identified in discovery assay

Table S5: MS 1 precursor ions for clusterin protein

**Figure S1**

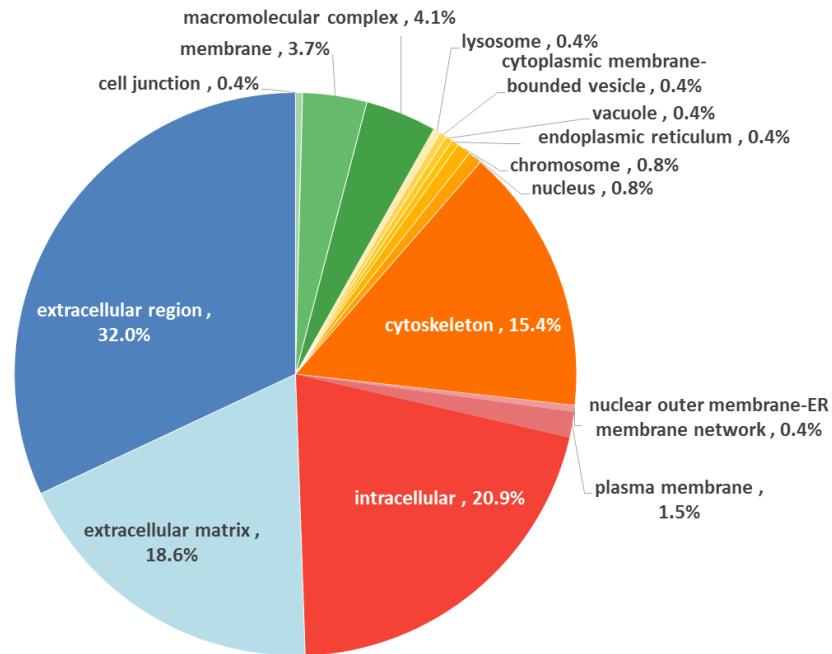

Figure S1. Gene ontology based classification of total proteins from cartilage by guanidine-HCl extraction. The pie chart depicts the putative protein type based on gene ontology IDs. This demonstrates that cartilage decellularization prior to extraction yields a majority (50.6%) of extracellular proteins representing a great enrichment.

**Table S1. Peptide sequence, transitions, and collision energy for MRM**

**Table S2: Quantification results of MRM experiments**

**Table S3: Less abundant proteins identified from guanidine-HCl extraction**

**Table S4: Proteins identified in discovery assay**

**Table S5: MS 1 precursor ions for clusterin protein**

**(Provided in Excel Format file)**

**Table S1. Peptide sequence, transitions, and collision energy for MRM**

| Accession | ID    | Collision energy | Peptide sequence   | Preursor m/z | Product m/z                                                                           |
|-----------|-------|------------------|--------------------|--------------|---------------------------------------------------------------------------------------|
| O15232    | MATN3 | 26.2             | AQASGIELYAVGVDR    | 774.9        | 1021.53 (y9)892.49 (y8)779.4 (y7)616.34 (y6)446.24 (y4)                               |
| O15232    | MATN3 | 23.9             | IIDTLDIGPADTR      | 700.38       | 957.5 (y9)844.42 (y8)729.39 (y7)616.3 (y6)559.28 (y5)                                 |
| O15232    | MATN3 | 20.2             | VAVVNYASTVK        | 575.83       | 980.54 (y9)881.47 (y8)782.4 (y7)668.36 (y6)                                           |
| O15335    | CHAD  | 23.3             | FSDGAFLGVTTLK      | 678.36       | 738.35 (b7)878.53 (y8)731.47 (y7)618.38 (y6)                                          |
| O15335    | CHAD  | 23.4             | NQLSSYPSAALSK      | 683.35       | 1123.6 (y11)1010.52 (y10)923.48 (y9)836.45 (y8)673.39 (y7)                            |
| O15335    | CHAD  | 23               | SIPDNAFQSFGR       | 669.83       | 1138.53 (y10)1041.47 (y9)926.45 (y8)741.37 (y6)                                       |
| O15335    | CHAD  | 29.2             | YLETWLWDNTNLEK     | 876.45       | 1132.56 (y9)946.48 (y8)833.4 (y7)                                                     |
| O75339    | CILP1 | 18               | ASVTFLDPR          | 503.27       | 847.47 (y7)748.4 (y6)647.35 (y5)                                                      |
| O75339    | CILP1 | 19.7             | FAPIVLTMPK         | 558.83       | 898.54 (y8)801.49 (y7)688.41 (y6)589.34 (y5)                                          |
| O75339    | CILP1 | 28               | FNPNAIGVPQPYLNK    | 836.45       | 813.43 (b8)1015.56 (y9)859.47 (y7)634.36 (y5)                                         |
| O75339    | CILP1 | 18.3             | FYQIEGDR           | 514.25       | 717.35 (y6)589.29 (y5)476.21 (y4)                                                     |
| O75339    | CILP1 | 21.3             | GTFTLHVPQDTER      | 500.92       | 520.28 (b5)844.42 (y7)745.35 (y6)520.24 (y4)                                          |
| O75339    | CILP1 | 19.4             | IVGPLEVNVR         | 548.33       | 883.5 (y8)826.48 (y7)729.43 (y6)616.34 (y5)                                           |
| O75339    | CILP1 | 17.4             | LVLTFVDR           | 481.79       | 750.41 (y6)637.33 (y5)536.28 (y4)                                                     |
| O75339    | CILP1 | 20.3             | TFLVGNLEIR         | 581.33       | 913.55 (y8)800.46 (y7)701.39 (y6)                                                     |
| O75339    | CILP1 | 16.3             | TGFLSNPR           | 446.24       | 733.4 (y6)586.33 (y5)473.25 (y4)                                                      |
| P02458    | CO2A1 | 20.7             | DVWKPEPCR          | 593.79       | 786.39 (y6)658.3 (y5)432.2 (y3)658.3 (y5)432.2 (y3)                                   |
| P02458    | CO2A1 | 23.9             | GPPGPQGPAGEQGPR    | 701.35       | 1247.61 (y13)1150.56 (y12)1093.54 (y11)868.43 (y9)811.41 (y8)                         |
| P02458    | CO2A1 | 34               | SGDYWIDPNQGCTLDAMK | 1035.95      | 837.34 (b7)1349.58 (y12)1234.56 (y11)895.4 (y8)                                       |
| P02458    | CO2A1 | 20.5             | SLNNQIESIR         | 587.31       | 973.51 (y8)859.46 (y7)617.36 (y5)504.28 (y4)                                          |
| P02751    | FINC  | 26.1             | SYTITGLQPGTDYK     | 772.39       | 1079.54 (y10)978.49 (y9)680.32 (y6)                                                   |
| P02751    | FINC  | 23.2             | WLPSSSPVTGYR       | 675.35       | 1050.52 (y10)953.47 (y9)866.44 (y8)692.37 (y6)                                        |
| P02751    | FINC  | 19               | YEVSVYALK          | 536.29       | 908.51 (y8)779.47 (y7)680.4 (y6)494.3 (y4)                                            |
| P07585    | PGS2  | 18.1             | NLHALILVNNK        | 416.92       | 436.23 (b4)549.31 (b5)587.35 (y5)474.27 (y4)                                          |
| P07585    | PGS2  | 19.7             | VSPGAFTPLVK        | 558.33       | 929.55 (y9)832.49 (y8)775.47 (y7)704.43 (y6)                                          |
| P07585    | PGS2  | 21.4             | VVQCSDLGLDK        | 617.31       | 1035.48 (y9)907.42 (y8)747.39 (y7)                                                    |
| P07996    | TSP1  | 23.8             | FVFGTTPEDILR       | 697.87       | 1148.59 (y10)1001.53 (y9)843.46 (y7)742.41 (y6)                                       |
| P07996    | TSP1  | 18.4             | GPDPSSPAFR         | 515.75       | 761.39 (y7)664.34 (y6)577.31 (y5)490.28 (y4)                                          |
| P07996    | TSP1  | 21               | SITLQVQEDR         | 604.32       | 1007.52 (y8)793.38 (y6)646.32 (y5)547.25 (y4)                                         |
| P08493    | MGP   | 22.1             | NANTFISPQQR        | 638.33       | 875.47 (y7)728.4 (y6)615.32 (y5)528.29 (y4)                                           |
| P08493    | MGP   | 26.3             | YAMVYGYNAAYNR      | 778.35       | 1091.49 (y9)928.43 (y8)871.41 (y7)708.34 (y6)                                         |
| P09486    | SPRC  | 20.4             | APLIPMEHCTTR       | 475.9        | 1031.44 (y8)803.35 (y6)674.3 (y5)537.24 (y4)516.22 (y8)                               |
| P09486    | SPRC  | 20.3             | LEAGDHPVELLAR      | 473.92       | 797.49 (y7)700.44 (y6)601.37 (y5)589.32 (y11)                                         |
| P09486    | SPRC  | 19.5             | NVLVTLYER          | 553.81       | 893.51 (y7)780.43 (y6)681.36 (y5)                                                     |
| P10451    | OSTP  | 25.7             | AIPVAQDLNAPSDWDSR  | 927.95       | 1474.66 (y13)1275.56 (y11)1160.53 (y10)1047.45 (y9)933.41 (y8)862.37 (y7)993.54 (b10) |
| P10451    | OSTP  | 17.4             | GDSVVYGLR          | 483.26       | 793.46 (y7)706.42 (y6)607.36 (y5)508.29 (y4)345.22 (y3)                               |
| P10451    | OSTP  | 29.9             | YPDAVATWLNPDPSQK   | 901.44       | 1256.63 (y11)1185.59 (y10)671.34 (y6)459.26 (y4)                                      |
| P10915    | HPLN1 | 16.6             | DPTAFGSGIHK        | 377.19       | 745.4 (y7)598.33 (y6)541.31 (y5)454.28 (y4)                                           |
| P10915    | HPLN1 | 17.3             | FYYLIHPTK          | 394.55       | 708.44 (y6)595.36 (y5)482.27 (y4)345.21 (y3)                                          |
| P10915    | HPLN1 | 18.2             | VGQIFAAWK          | 510.29       | 920.5 (y8)735.42 (y6)622.33 (y5)475.27 (y4)                                           |
| P12109    | CO6A1 | 23.2             | GLEQLLVGGSHLK      | 675.89       | 923.57 (y9)810.48 (y8)697.4 (y7)598.33 (y6)                                           |
| P12109    | CO6A1 | 18.6             | LSIIATDHTYR        | 430.57       | 976.48 (y8)863.4 (y7)792.36 (y6)576.29 (y4)                                           |
| P12109    | CO6A1 | 24.6             | TAEYDVAYGESHLFR    | 586.61       | 1079.53 (y9)1008.49 (y8)845.43 (y7)659.36 (y5)                                        |
| P12111    | CO6A3 | 24               | LSDAGITPLFLTR      | 702.4        | 1017.61 (y9)960.59 (y8)847.5 (y7)746.46 (y6)                                          |
| P12111    | CO6A3 | 24.4             | SDDEVDDPAVELK      | 716.33       | 985.52 (y9)886.45 (y8)771.42 (y7)656.4 (y6)                                           |
| P12111    | CO6A3 | 24.8             | SLDEISQPAQELK      | 729.38       | 1257.63 (y11)1013.56 (y9)900.48 (y8)813.45 (y7)685.39 (y6)                            |
| P13611    | CSPG2 | 17.1             | FTFEEAAK           | 471.73       | 795.39 (y7)694.34 (y6)547.27 (y5)                                                     |
| P13611    | CSPG2 | 22.6             | LATVGELQAAR        | 657.86       | 1029.55 (y9)930.48 (y8)873.46 (y7)744.42 (y6)631.33 (y5)                              |

| Accession | ID    | Collision energy | Peptide sequence      | Preursor m/z | Product m/z                                                  |
|-----------|-------|------------------|-----------------------|--------------|--------------------------------------------------------------|
| P13611    | CSPG2 | 19.1             | LLASDAGLYR            | 539.8        | 852.42 (y8)781.38 (y7)694.35 (y6)579.32 (y5)                 |
| P13942    | COBA2 | 18.7             | DFSLLTVVR             | 525.3        | 787.5 (y7)700.47 (y6)587.39 (y5)474.3 (y4)                   |
| P13942    | COBA2 | 19.1             | ELECEGGQR             | 539.24       | 835.34 (y7)706.29 (y6)546.26 (y5)                            |
| P13942    | COBA2 | 31               | FLYEDQTGRPQQPPSQPVFR  | 754.71       | 1152.62 (y10)927.5 (y8)830.45 (y7)1001.49 (y17)919.96 (y16)  |
| P13942    | COBA2 | 16.8             | SPQQQPSR              | 464.24       | 743.38 (y6)615.32 (y5)487.26 (y4)359.2 (y3)                  |
| P16112    | PGCA  | 18               | ETWVDAER              | 503.24       | 775.37 (y6)589.29 (y5)490.23 (y4)                            |
| P16112    | PGCA  | 16.3             | GIVFHVR               | 446.25       | 721.38 (y5)622.31 (y4)475.24 (y3)                            |
| P16112    | PGCA  | 20.4             | LEGEVFFATR            | 584.8        | 1055.52 (y9)926.47 (y8)740.41 (y6)641.34 (y5)                |
| P16112    | PGCA  | 15.5             | TIEGDFR               | 419.21       | 736.36 (y6)623.28 (y5)494.24 (y4)                            |
| P16112    | PGCA  | 31.1             | VSLPNYPAIPSDATLEVQSLR | 757.41       | 1315.69 (y12)945.54 (y8)844.49 (y7)731.4 (y6)                |
| P16112    | PGCA  | 17.8             | YEINSLVR              | 497.27       | 830.47 (y7)701.43 (y6)588.35 (y5)                            |
| P16112    | PGCA  | 15.4             | YPIVSPR               | 416.24       | 668.41 (y6)571.36 (y5)458.27 (y4)359.2 (y3)                  |
| P16112    | PGCA  | 16.9             | YTLDFDR               | 465.22       | 766.37 (y6)665.33 (y5)552.24 (y4)                            |
| P20774    | MIME  | 17.5             | ESAYLYAR              | 486.74       | 756.4 (y6)685.37 (y5)522.3 (y4)409.22 (y3)                   |
| P20774    | MIME  | 18.5             | LEGNPIVLGK            | 520.31       | 926.53 (y9)797.49 (y8)626.42 (y6)317.22 (y3)                 |
| P20774    | MIME  | 30.1             | LSLLEELSLAENQLLK      | 907.02       | 1128.66 (y10)1015.58 (y9)928.55 (y8)815.46 (y7)              |
| P21810    | PGS1  | 22.6             | IQAIELEDLLR           | 656.88       | 1071.6 (y9)1000.57 (y8)887.48 (y7)758.44 (y6)                |
| P21810    | PGS1  | 18               | LGLGHNQIR             | 504.29       | 724.38 (y6)667.36 (y5)530.3 (y4)                             |
| P21810    | PGS1  | 16.8             | VPSGLPDLK             | 463.27       | 666.35 (b7)826.47 (y8)729.41 (y7)642.38 (y6)472.28 (y4)      |
| P21810    | PGS1  | 19.7             | VVQCSDLGLK            | 559.8        | 920.45 (y8)792.39 (y7)632.36 (y6)                            |
| P24821    | TENA  | 16.8             | AYAAGFGDR             | 464.22       | 693.33 (y7)622.29 (y6)551.26 (y5)494.24 (y4)                 |
| P24821    | TENA  | 25.1             | EEFWLGLDNLNK          | 739.37       | 1072.58 (y9)886.5 (y8)773.42 (y7)603.31 (y5)                 |
| P24821    | TENA  | 29.3             | GLEPGQEYNVLLTAEK      | 880.96       | 1461.76 (y13)1179.63 (y10)1050.58 (y9)887.52 (y8)674.41 (y6) |
| P24821    | TENA  | 20.6             | ITAQQQYELR            | 589.81       | 964.48 (y8)893.45 (y7)765.39 (y6)708.37 (y5)                 |
| P35443    | TSP4  | 23.1             | AFAGPSQKPETIELR       | 548.63       | 985.57 (y8)857.47 (y7)631.38 (y5)713.39 (y13)                |
| P35443    | TSP4  | 32.6             | DVDIDSYDEELPCSAR      | 990.93       | 808.34 (b7)1336.58 (y11)1173.52 (y10)703.36 (y6)590.27 (y5)  |
| P35443    | TSP4  | 28.1             | SSATIFGLYSSTDNSK      | 839.4        | 1218.56 (y11)1071.5 (y10)901.39 (y8)738.33 (y7)              |
| P35443    | TSP4  | 23.2             | YVPNSGQEDADR          | 675.8        | 1088.46 (y10)991.41 (y9)877.36 (y8)790.33 (y7)               |
| P49747    | COMP  | 21.7             | DTDLDGFPDEK           | 626.27       | 920.44 (y8)807.35 (y7)692.32 (y6)488.24 (y4)                 |
| P49747    | COMP  | 25.2             | ELQETNAALQDVR         | 743.88       | 987.52 (y9)886.47 (y8)772.43 (y7)701.39 (y6)630.36 (y5)      |
| P49747    | COMP  | 22.6             | LVPNPGQEDADR          | 655.82       | 1098.48 (y10)887.39 (y8)790.33 (y7)605.25 (y5)               |
| P49747    | COMP  | 18.4             | SSTGPGEQLR            | 516.26       | 857.4 (b9)857.45 (y8)756.4 (y7)699.38 (y6)602.33 (y5)        |
| P51884    | LUM   | 18.3             | FNALQYLR              | 512.78       | 877.49 (y7)763.45 (y6)692.41 (y5)579.32 (y4)                 |
| P51884    | LUM   | 21.3             | ISNIPDEYFK            | 613.31       | 1112.53 (y9)1025.49 (y8)798.37 (y6)                          |
| P51884    | LUM   | 18.7             | SLEDLQLTHNK           | 433.23       | 740.4 (y6)612.35 (y5)499.26 (y4)398.21 (y3)                  |
| P51888    | PRELP | 22.5             | LENLLLLLDLQHNR        | 530.97       | 1008.56 (y8)895.47 (y7)782.39 (y6)667.36 (y5)                |
| P51888    | PRELP | 23.2             | NQLEEVPSALPR          | 676.86       | 1110.62 (y10)997.53 (y9)868.49 (y8)739.45 (y7)640.38 (y6)    |
| P51888    | PRELP | 22.6             | VPTAIHQLYLDSNK        | 533.62       | 852.45 (y7)739.36 (y6)576.3 (y5)463.21 (y4)348.19 (y3)       |
| P98160    | PGBM  | 30.1             | EVSEAVVDTLESEYLK      | 905.95       | 516.23 (b5)1196.6 (y10)1097.54 (y9)                          |
| P98160    | PGBM  | 20.6             | IAHVELADAGQYR         | 481.58       | 550.3 (b5)663.38 (b6)709.33 (y6)594.3 (y5)523.26 (y4)        |
| P98160    | PGBM  | 19.8             | LEGDTLIIPR            | 563.83       | 884.52 (y8)827.5 (y7)712.47 (y6)611.42 (y5)                  |
| Q06828    | FMOD  | 23.3             | ELHLDHNQISR           | 681.35       | 982.51 (y8)869.42 (y7)754.4 (y6)617.34 (y5)                  |
| Q06828    | FMOD  | 27.1             | IPPVNTNLENLYLQGNR     | 652.35       | 736.4 (b7)750.39 (y6)587.33 (y5)474.24 (y4)                  |
| Q06828    | FMOD  | 22.4             | SAMPADAPLCLR          | 651.32       | 1012.52 (y9)844.43 (y7)729.41 (y6)658.37 (y5)                |
| Q06828    | FMOD  | 17.6             | YLPFVPSR              | 489.77       | 702.39 (y6)605.34 (y5)458.27 (y4)359.2 (y3)                  |
| Q07507    | DERM  | 20               | GATTTFSAYER           | 570.29       | 910.46 (y8)809.42 (y7)708.37 (y6)                            |
| Q07507    | DERM  | 18.3             | YFESVLDR              | 514.76       | 527.21 (b4)718.37 (y6)589.33 (y5)                            |
| Q8IUL8    | CILP2 | 22.5             | DLTSAASAPSDLR         | 652.33       | 974.49 (y10)816.42 (y8)745.38 (y7)658.35 (y6)587.31 (y5)     |
| Q8IUL8    | CILP2 | 20.8             | EMSEAAQAQAR           | 596.27       | 931.46 (y9)715.38 (y7)644.35 (y6)573.31 (y5)445.25 (y4)      |
| Q8IUL8    | CILP2 | 22.7             | FVDSGDGELAPLR         | 659.84       | 1072.53 (y10)957.5 (y9)755.44 (y7)456.29 (y4)385.26 (y3)     |

| Accession | ID    | Collision energy | Peptide sequence  | Preursor m/z | Product m/z                                                |
|-----------|-------|------------------|-------------------|--------------|------------------------------------------------------------|
| Q8IUL8    | CILP2 | 21.2             | IQGPQEYMVR        | 610.81       | 979.47 (y8)922.45 (y7)697.33 (y5)568.29 (y4)               |
| Q8IUL8    | CILP2 | 23.3             | LLESPATALGDIR     | 678.38       | 1129.58 (y11)1000.54 (y10)913.51 (y9)745.42 (y7)           |
| Q8IUL8    | CILP2 | 24               | TTDWALPSAVGER     | 701.85       | 899.49 (y9)828.46 (y8)715.37 (y7)                          |
| Q8IUL8    | CILP2 | 20.1             | VFLVGNVEIR        | 573.34       | 899.53 (y8)786.45 (y7)687.38 (y6)                          |
| Q8IUL8    | CILP2 | 19.6             | VVAADSGEPLR       | 557.3        | 915.45 (y9)844.42 (y8)773.38 (y7)658.35 (y6)               |
| Q92743    | HTRA1 | 16.1             | LPVLLLGR          | 440.8        | 767.51 (y7)670.46 (y6)571.39 (y5)458.31 (y4)               |
| Q92743    | HTRA1 | 22.5             | VTAGISFAIPSDK     | 653.36       | 1105.59 (y11)864.45 (y8)777.41 (y7)446.22 (y4)             |
| Q92743    | HTRA1 | 20.9             | YNFIADVVEK        | 599.31       | 920.51 (y8)773.44 (y7)660.36 (y6)                          |
| Q92954    | PRG4  | 20               | DAGYPKPIFK        | 568.31       | 949.55 (y8)729.47 (y6)632.41 (y5)504.32 (y4)               |
| Q92954    | PRG4  | 23.5             | DQYYNIDVPSR       | 685.32       | 1126.55 (y9)963.49 (y8)800.43 (y7)359.2 (y3)               |
| Q92954    | PRG4  | 27.7             | GLPNVVTSAISLPNIR  | 825.98       | 1170.68 (y11)1071.62 (y10)812.5 (y7)699.41 (y6)            |
| Q92954    | PRG4  | 20.7             | KPDGYDYAFSK       | 485.23       | 676.29 (b6)839.36 (b7)615.31 (y5)452.25 (y4)               |
| Q92954    | PRG4  | 25.9             | RPALNYPVYGETTQVR  | 622          | 911.51 (b8)953.47 (y8)790.41 (y7)733.38 (y6)               |
| Q99983    | OMD   | 16.6             | IDYGVFAK          | 456.74       | 799.4 (y7)684.37 (y6)521.31 (y5)                           |
| Q99983    | OMD   | 20.2             | LLGYNEISK         | 575.33       | 923.48 (y8)810.4 (y7)753.38 (y6)590.31 (y5)                |
| Q9BXN1    | ASPN  | 20.6             | ISTVELEDFK        | 590.81       | 980.49 (y8)879.45 (y7)780.38 (y6)651.33 (y5)               |
| Q9BXN1    | ASPN  | 27.4             | LYLSHNQLSEIPLNLPK | 660.37       | 856.43 (b7)1185.59 (b10)1010.59 (y9)794.51 (y7)681.43 (y6) |
| Q9BXN1    | ASPN  | 26.2             | SLYSAISLFNNPVK    | 776.92       | 1031.59 (y9)918.5 (y8)831.47 (y7)718.39 (y6)343.23 (y3)    |
| Q9BXN1    | ASPN  | 22.8             | YWEMQPATFR        | 664.81       | 979.47 (y8)850.42 (y7)719.38 (y6)591.32 (y5)               |

**Table S2. Quantification results of MRM experiments**

| Accession | Protein Name | Peptide Sequence  | Gu-HCl  | Gu-HCl + Surfactant | In Situ digestion + Ultrafiltration | In Situ digestion |
|-----------|--------------|-------------------|---------|---------------------|-------------------------------------|-------------------|
| Q9H1Z8    | AUGN         | HYDEDSAIGPR       | NA      | NA                  | NA                                  | NA                |
| Q9H1Z8    | AUGN         | FEDDITYWLNK       | NA      | NA                  | NA                                  | NA                |
| Q9BXN1    | ASPN         | YWEMQPATFR        | NA      | NA                  | NA                                  | NA                |
| Q9BXN1    | ASPN         | SLYSAISLFNNPVK    | NA      | NA                  | NA                                  | NA                |
| Q9BXN1    | ASPN         | LYLSHNQLSEIPLNLPK | NA      | NA                  | NA                                  | NA                |
| Q9BXN1    | ASPN         | ISTVELEDFK        | 2.7E+04 | 1.2E+05             | 8.4E+03                             | 2.4E+03           |
| Q99983    | OMD          | LLLGYNK           | 2.5E+04 | 9.2E+04             | 1.5E+05                             | 1.1E+05           |
| Q99983    | OMD          | IDYGVFAK          | 2.4E+04 | 8.5E+04             | 1.1E+05                             | 1.0E+05           |
| Q92954    | PRG4         | RPALNYPVYGETTQVR  | 2.6E+04 | 5.0E+04             | 4.9E+04                             | NA                |
| Q92954    | PRG4         | KPDGYDYAFSK       | NA      | NA                  | NA                                  | NA                |
| Q92954    | PRG4         | GLPNVVTSAISLPNIR  | NA      | NA                  | NA                                  | NA                |
| Q92954    | PRG4         | DQYYNIDVPSR       | 9.4E+04 | 1.5E+05             | 2.2E+05                             | 2.2E+05           |
| Q92954    | PRG4         | DAGYPKPIFK        | 2.7E+04 | 9.4E+04             | 1.5E+05                             | 1.0E+05           |
| Q92743    | HTRA1        | YNFIADVVEK        | 3.2E+04 | 1.5E+05             | 3.2E+04                             | NA                |
| Q92743    | HTRA1        | VTAGISFAIPSDK     | 1.9E+04 | 1.2E+05             | 3.1E+05                             | NA                |
| Q92743    | HTRA1        | LPVLLGR           | 6.0E+04 | 3.9E+05             | 2.6E+05                             | NA                |
| Q8IUL8    | CILP2        | VVAADSGEPLR       | 3.3E+04 | 6.3E+04             | 1.4E+05                             | 8.8E+04           |
| Q8IUL8    | CILP2        | VFLVGNVEIR        | NA      | NA                  | 7.2E+06                             | NA                |
| Q8IUL8    | CILP2        | TTDWALPSAVGER     | 1.7E+04 | 3.0E+04             | 8.9E+04                             | 3.8E+04           |
| Q8IUL8    | CILP2        | LLESPATLGDIR      | 3.4E+05 | 6.7E+05             | 5.2E+06                             | NA                |
| Q8IUL8    | CILP2        | IQQPQEYVMR        | 5.0E+03 | 3.3E+04             | 2.0E+05                             | 1.0E+05           |
| Q8IUL8    | CILP2        | FVDSGELAPLR       | 2.0E+04 | 4.8E+04             | 4.2E+04                             | 3.9E+04           |
| Q8IUL8    | CILP2        | EMSEAAQAQAR       | 9.2E+03 | 2.8E+04             | 1.1E+05                             | 6.5E+04           |
| Q8IUL8    | CILP2        | DLTSAASAPSDLR     | 2.6E+04 | 5.9E+04             | 3.7E+04                             | 3.0E+04           |
| Q6NUI6    | CHADL        | ITEVSLGALGPAPR    | NA      | NA                  | NA                                  | NA                |
| Q6NUI6    | CHADL        | FLQVPGAALR        | 1.3E+04 | 2.0E+04             | 3.7E+04                             | NA                |
| Q6NUI6    | CHADL        | ELLLDGGALQALGPR   | NA      | NA                  | NA                                  | NA                |
| Q6NUI6    | CHADL        | AAAAVFEDCPGWAAR   | NA      | NA                  | NA                                  | NA                |
| Q07507    | DERM         | YFESVLDK          | 4.3E+04 | 2.7E+05             | 7.5E+04                             | 5.4E+04           |
| Q07507    | DERM         | GATTTFAVER        | 2.2E+04 | 1.3E+05             | 2.1E+05                             | 1.5E+05           |
| Q06828    | FMOD         | YLPFVPSR          | 5.9E+06 | 2.7E+07             | 2.2E+07                             | 9.3E+06           |
| Q06828    | FMOD         | SAMPADAPLCLR      | 6.6E+04 | 1.2E+06             | 2.0E+05                             | 1.4E+05           |
| Q06828    | FMOD         | IPPVNTNLENLYLQGNR | 1.6E+06 | 8.6E+06             | 5.2E+06                             | NA                |
| Q06828    | FMOD         | ELHLDHNQISR       | NA      | 2.4E+05             | 8.3E+05                             | 7.1E+05           |
| P98160    | PGBM         | LEGDTLIIPR        | 2.3E+04 | 5.3E+04             | 1.0E+05                             | 6.9E+04           |
| P98160    | PGBM         | IAHVELADAGQYR     | 2.0E+04 | 4.9E+04             | 7.2E+04                             | NA                |
| P98160    | PGBM         | EVSEAVVDTLESEYK   | NA      | NA                  | NA                                  | NA                |
| P51888    | PRELP        | VPTAIHQLYLDNSK    | 8.5E+05 | 3.4E+06             | NA                                  | NA                |
| P51888    | PRELP        | NQLEEVPSALPR      | 1.8E+07 | 6.1E+07             | 2.9E+07                             | 2.7E+07           |
| P51888    | PRELP        | LENLLLLDLQHNK     | NA      | NA                  | 1.3E+05                             | NA                |
| P51884    | LUM          | SLEDLQLTHNK       | 2.4E+05 | 1.4E+06             | 3.9E+05                             | 2.0E+05           |
| P51884    | LUM          | ISNIPDEYFK        | 1.5E+06 | 9.2E+06             | 2.7E+05                             | 2.3E+05           |
| P51884    | LUM          | FNALQYLR          | 1.7E+06 | 5.9E+06             | 9.2E+05                             | NA                |
| P49747    | COMP         | SSTGPGEQLR        | 3.9E+06 | 8.0E+06             | 4.3E+06                             | 3.5E+06           |
| P49747    | COMP         | LVPNPGQEDADR      | 1.3E+06 | 1.5E+06             | 2.2E+05                             | 1.5E+05           |
| P49747    | COMP         | ELQETNAALQDVR     | 2.6E+06 | 5.0E+06             | 4.5E+06                             | 3.6E+06           |
| P49747    | COMP         | DTDLDGFPDEK       | 3.5E+06 | 5.5E+06             | 4.4E+06                             | 3.0E+06           |
| P35443    | TSP4         | YVPNSGQEDADR      | 1.0E+04 | 1.4E+04             | NA                                  | NA                |
| P35443    | TSP4         | SSATIFGLYSSTDNSK  | NA      | 2.2E+04             | 7.1E+04                             | NA                |
| P35443    | TSP4         | DVDIDSYPDEELPCSAR | 4.3E+04 | 1.3E+05             | 1.7E+05                             | 1.2E+05           |
| P35443    | TSP4         | AFAGPSQKPETIELR   | 1.9E+04 | 6.0E+04             | 8.7E+04                             | 4.3E+04           |
| P24821    | TENA         | ITAQQQYELR        | 3.7E+04 | 1.3E+05             | 3.5E+05                             | 1.9E+05           |
| P24821    | TENA         | GLEPGQEYNVLLTAEK  | 1.9E+04 | 4.7E+04             | 1.5E+05                             | NA                |
| P24821    | TENA         | EEFWLGLDNLNK      | NA      | NA                  | NA                                  | NA                |
| P24821    | TENA         | AYAAGFGDR         | 2.1E+05 | 5.3E+05             | 5.2E+05                             | 4.1E+05           |
| P22105    | TENX         | LGPISADSTTAPEK    | 3.4E+04 | 7.2E+04             | 2.1E+05                             | 1.3E+05           |
| P22105    | TENX         | ILISGLEPSTPYR     | 2.2E+04 | 7.6E+04             | 2.8E+05                             | NA                |
| P22105    | TENX         | GLAPGQEYQVTVR     | NA      | 1.4E+04             | 8.4E+04                             | 4.8E+04           |
| P21941    | MATN1        | VGIVFTDGR         | NA      | NA                  | NA                                  | NA                |
| P21941    | MATN1        | LAQVGLVQYSSSVR    | NA      | NA                  | NA                                  | NA                |
| P21815    | SIAL         | HAYFYPHLK         | NA      | NA                  | NA                                  | NA                |
| P21815    | SIAL         | AYEDEYSYFK        | NA      | NA                  | NA                                  | NA                |
| P21810    | PGS1         | VVQCSDLGLK        | 7.3E+06 | 2.8E+07             | 1.4E+07                             | 9.7E+06           |
| P21810    | PGS1         | VPSGLPDLK         | 1.6E+07 | 4.4E+07             | 1.9E+07                             | 1.6E+07           |
| P21810    | PGS1         | LGLGHNQIR         | 8.1E+05 | 3.3E+06             | 1.0E+06                             | 1.0E+06           |
| P21810    | PGS1         | IQAIELEDLLR       | 7.9E+06 | 2.9E+07             | 5.2E+06                             | NA                |

|        |       |                       |         |         |         |         |
|--------|-------|-----------------------|---------|---------|---------|---------|
| P20849 | CO9A1 | VIQEHFAEMAASLK        | NA      | NA      | NA      | NA      |
| P20849 | CO9A1 | VIQEHFAEMAASLK        | NA      | NA      | NA      | NA      |
| P20849 | CO9A1 | ETCHELPPAR            | NA      | NA      | 6.7E+04 | 5.8E+04 |
| P20774 | MIME  | LSLLEELS LAENQLLK     | 3.0E+04 | 1.4E+05 | 3.3E+05 | 1.5E+05 |
| P20774 | MIME  | LEGNPIVLGK            | 1.5E+06 | 8.3E+06 | 1.5E+06 | 1.0E+06 |
| P20774 | MIME  | ESAYLYAR              | 2.2E+06 | 1.3E+07 | 7.0E+06 | 5.7E+06 |
| P16112 | PGCA  | YTLDFDR               | 4.0E+07 | 7.5E+07 | 1.6E+07 | 1.4E+07 |
| P16112 | PGCA  | YPIVSPR               | 6.3E+07 | 1.0E+08 | 3.8E+07 | 3.6E+07 |
| P16112 | PGCA  | YEINSLVR              | 1.8E+06 | 3.0E+06 | 1.2E+06 | 7.7E+05 |
| P16112 | PGCA  | VSLPNYPAIPSDATLEVQSLR | 1.3E+06 | 3.1E+06 | 1.6E+06 | NA      |
| P16112 | PGCA  | TIEGDFR               | 6.2E+06 | 9.5E+06 | 4.7E+06 | 3.5E+06 |
| P16112 | PGCA  | LEGEVFFATR            | NA      | NA      | NA      | NA      |
| P16112 | PGCA  | GIVFHYP               | 5.8E+06 | 1.7E+07 | 5.0E+06 | 1.2E+06 |
| P16112 | PGCA  | ETWVDAER              | 2.6E+06 | 4.0E+06 | 3.6E+05 | 2.0E+05 |
| P13942 | COBA2 | SPQQQPSR              | NA      | NA      | NA      | NA      |
| P13942 | COBA2 | FLYEDQTRPQPPSQPVFR    | 7.3E+04 | 1.2E+05 | 4.4E+04 | NA      |
| P13942 | COBA2 | ELECEGGQR             | NA      | 2.2E+04 | NA      | NA      |
| P13942 | COBA2 | DFSLLTVVR             | 1.2E+04 | 1.2E+05 | 1.4E+04 | NA      |
| P13611 | CSPG2 | LLASDAGLYR            | 1.7E+04 | 3.6E+04 | 2.8E+04 | 1.9E+04 |
| P13611 | CSPG2 | LATVGELQAAWR          | NA      | NA      | NA      | NA      |
| P13611 | CSPG2 | FTFEEAAK              | NA      | NA      | NA      | NA      |
| P12111 | CO6A3 | SLDEISQPAQELK         | 1.2E+05 | 3.6E+05 | 6.2E+05 | 4.0E+05 |
| P12111 | CO6A3 | SDDEVDDPAVELK         | 8.6E+04 | 2.2E+05 | 1.3E+06 | 9.1E+05 |
| P12111 | CO6A3 | LSDAGITPLFLTR         | 4.6E+04 | 1.5E+05 | 3.0E+06 | NA      |
| P12109 | CO6A1 | TAEYDVAYGESHFR        | 2.6E+04 | 8.9E+04 | 1.2E+06 | NA      |
| P12109 | CO6A1 | LSIIATDHTYR           | 6.1E+04 | 1.5E+05 | 1.0E+06 | 2.5E+05 |
| P12109 | CO6A1 | GLEQLLVGGSHLK         | NA      | NA      | 2.9E+05 | NA      |
| P10915 | HPLN1 | VGQIFAAWK             | NA      | 2.7E+06 | 4.1E+06 | NA      |
| P10915 | HPLN1 | FYYLIHPTK             | NA      | 1.0E+05 | 6.1E+05 | NA      |
| P10915 | HPLN1 | DPTAFSGSIHK           | 2.7E+05 | 1.4E+06 | 1.4E+05 | 1.1E+05 |
| P10451 | OSTP  | YPDVAVATWLNPDPSQK     | NA      | NA      | NA      | NA      |
| P10451 | OSTP  | GDSVVYGLR             | NA      | NA      | NA      | NA      |
| P10451 | OSTP  | AIPVAQDLNAPSDWDSR     | NA      | NA      | NA      | NA      |
| P09486 | SPRC  | NVLVTLYER             | NA      | NA      | NA      | NA      |
| P09486 | SPRC  | LEAGDHPVELLAR         | NA      | NA      | NA      | NA      |
| P09486 | SPRC  | APLIPMEHCTTR          | NA      | NA      | NA      | NA      |
| P08493 | MGP   | YAMVYGYNAAYNR         | NA      | NA      | NA      | NA      |
| P08493 | MGP   | NANTFISPPQR           | 1.6E+05 | 1.6E+05 | 5.1E+05 | 5.2E+05 |
| P07996 | TSP1  | SITLFVQEDR            | 2.0E+05 | 3.9E+05 | 3.8E+05 | NA      |
| P07996 | TSP1  | GPDPPSPAFR            | 2.8E+05 | 5.7E+05 | 3.4E+05 | 3.0E+05 |
| P07996 | TSP1  | FVFGTTPEDILR          | 1.2E+05 | 2.4E+05 | 1.5E+05 | NA      |
| P07585 | PGS2  | VVQCSDLGLDK           | 3.6E+06 | 1.3E+07 | 1.9E+06 | 1.4E+06 |
| P07585 | PGS2  | VSPGAFTPLVK           | 5.1E+06 | 1.6E+07 | 1.0E+07 | 8.1E+06 |
| P07585 | PGS2  | NLHALILVNNK           | 1.6E+06 | 4.0E+06 | 1.6E+06 | NA      |
| P02751 | FINC  | YEVSVYALK             | 3.5E+05 | 1.1E+06 | 2.7E+06 | 5.9E+05 |
| P02751 | FINC  | WLPSSSPVTGYR          | 2.0E+05 | 4.6E+05 | 3.3E+06 | 2.4E+06 |
| P02751 | FINC  | SYTITGLQPQTDYK        | 1.2E+06 | 2.4E+06 | 4.9E+06 | 4.1E+06 |
| P02461 | CO3A1 | QQEAVEGGCSHLGQSYADR   | NA      | 9.5E+03 | 7.4E+04 | 4.7E+04 |
| P02461 | CO3A1 | QQEAVEGGCSHLGQSYADR   | 2.6E+03 | 1.0E+04 | 1.1E+05 | 6.0E+04 |
| P02461 | CO3A1 | GPVGPSPGPGK           | 7.0E+05 | 1.7E+06 | 5.5E+07 | 5.2E+07 |
| P02461 | CO3A1 | GPVGPSPGPGK           | 1.1E+06 | 2.3E+06 | 8.8E+07 | 8.0E+07 |
| P02458 | CO2A1 | SLNNQIESIR            | 7.2E+04 | 1.7E+05 | 7.3E+04 | 4.1E+04 |
| P02458 | CO2A1 | SGDYWIDPNQGCTLDAMK    | NA      | NA      | NA      | NA      |
| P02458 | CO2A1 | GPPGPQGPAGEQGP        | NA      | NA      | NA      | NA      |
| P02458 | CO2A1 | DVWKPEPCR             | NA      | NA      | NA      | NA      |
| P02458 | CO2A1 | DVWKPEPCR             | NA      | NA      | NA      | NA      |
| O75339 | CILP1 | TGFLSNPR              | 1.2E+06 | 2.5E+06 | 1.7E+07 | 1.5E+07 |
| O75339 | CILP1 | TFLVGNLEIR            | 5.2E+05 | 1.2E+06 | 7.9E+06 | NA      |
| O75339 | CILP1 | LVLTFVDR              | 1.5E+05 | 5.1E+05 | 2.3E+04 | NA      |
| O75339 | CILP1 | IVGPLEVNV             | 7.4E+05 | 2.1E+06 | 1.4E+07 | 1.1E+07 |
| O75339 | CILP1 | GTFTLHVPQDTER         | 3.9E+04 | 1.3E+05 | NA      | NA      |
| O75339 | CILP1 | FYQIEGDR              | 7.3E+05 | 1.3E+06 | 1.1E+06 | 9.5E+05 |
| O75339 | CILP1 | FNPNAIGVPQPYLNK       | 5.1E+04 | 1.1E+05 | 3.0E+06 | 1.8E+06 |
| O75339 | CILP1 | FAPIVLTPK             | NA      | NA      | NA      | NA      |
| O75339 | CILP1 | ASVTFLDPR             | 5.7E+04 | 1.5E+05 | 8.2E+04 | 6.8E+04 |
| O15335 | CHAD  | YLETLWLDNTNLEK        | NA      | 9.7E+04 | 4.9E+04 | NA      |
| O15335 | CHAD  | SIPDNFQSFGR           | 1.7E+05 | 9.1E+05 | 5.8E+05 | 3.9E+05 |
| O15335 | CHAD  | NQLSSYPSAALSK         | 6.0E+05 | 2.6E+06 | 9.4E+05 | 7.9E+05 |
| O15335 | CHAD  | FSDGAFLGVTTLK         | 1.8E+05 | 9.1E+05 | 4.8E+05 | NA      |



|        |       |                 |         |         |         |         |
|--------|-------|-----------------|---------|---------|---------|---------|
| O15232 | MATN3 | VAVVNYASTVK     | 5.0E+04 | 2.7E+05 | 4.3E+05 | 3.3E+05 |
| O15232 | MATN3 | IIDTLDIGPADTR   | 1.2E+05 | 3.7E+05 | 2.5E+05 | 2.1E+05 |
| O15232 | MATN3 | AQASGIELYAVGVDR | 4.3E+04 | 8.7E+04 | 1.5E+05 | NA      |

---

**Table S3. Less abundant proteins identified from guanidine-HCl extraction**

| Accession | Gene ID  | Description                                | MW [kDa] | Peptides # | Coverage (%) |
|-----------|----------|--------------------------------------------|----------|------------|--------------|
| P02768    | ALB      | Serum albumin                              | 69.3     | 34         | 56.3         |
| P01024    | C3       | Complement C3                              | 187.0    | 26         | 19.2         |
| P04264    | KRT1     | Keratin, type II cytoskeletal 1            | 66.0     | 26         | 38.5         |
| P08670    | VIM      | Vimentin                                   | 53.6     | 22         | 50.0         |
| P35908    | KRT2     | Keratin, type II cytoskeletal 2 epidermal  | 65.4     | 21         | 39.4         |
| P13645    | KRT10    | Keratin, type I cytoskeletal 10            | 58.8     | 20         | 37.0         |
| P35527    | KRT9     | Keratin, type I cytoskeletal 9             | 62.0     | 19         | 34.5         |
| O75339    | CILP     | Cartilage intermediate layer protein 1     | 132.5    | 18         | 18.2         |
| P07996    | THBS1    | Thrombospondin-1                           | 129.3    | 18         | 20.4         |
| P02787    | TF       | Serotransferrin                            | 77.0     | 17         | 30.9         |
| P13647    | KRT5     | Keratin, type II cytoskeletal 5            | 62.3     | 16         | 25.9         |
| P51888    | PRELP    | Prolargin                                  | 43.8     | 14         | 41.6         |
| P21810    | BGN      | Biglycan                                   | 41.6     | 12         | 38.9         |
| P08254    | MMP3     | Stromelysin-1                              | 53.9     | 12         | 24.3         |
| P00558    | PGK1     | Phosphoglycerate kinase 1                  | 44.6     | 12         | 37.9         |
| P24821    | TNC      | Tenascin                                   | 240.7    | 12         | 7.6          |
| P06733    | ENO1     | Alpha-enolase                              | 47.1     | 11         | 32.3         |
| P02533    | KRT14    | Keratin, type I cytoskeletal 14            | 51.5     | 11         | 26.3         |
| P14618    | PKM      | Pyruvate kinase PKM                        | 57.9     | 11         | 27.9         |
| P07355    | ANXA2    | Annexin A2                                 | 38.6     | 9          | 31.3         |
| P06396    | GSN      | Gelsolin                                   | 85.6     | 9          | 17.4         |
| P10915    | HAPLN1   | Hyaluronan and proteoglycan link protein 1 | 40.1     | 9          | 32.2         |
| P02545    | LMNA     | Prelamin-A/C                               | 74.1     | 9          | 15.2         |
| P51884    | LUM      | Lumican                                    | 38.4     | 9          | 32.2         |
| P10909    | CLU      | Clusterin                                  | 52.5     | 8          | 19.8         |
| P07585    | DCN      | Decorin                                    | 39.7     | 8          | 22.8         |
| P02675    | FGB      | Fibrinogen beta chain                      | 55.9     | 8          | 17.9         |
| P02538    | KRT6A    | Keratin, type II cytoskeletal 6A           | 60.0     | 8          | 12.9         |
| P04259    | KRT6B    | Keratin, type II cytoskeletal 6B           | 60.0     | 8          | 11.7         |
| P60709    | ACTB     | Actin, cytoplasmic 1                       | 41.7     | 7          | 22.9         |
| P02647    | APOA1    | Apolipoprotein A-I                         | 30.8     | 7          | 30.0         |
| O15335    | CHAD     | Chondroadherin                             | 40.5     | 7          | 21.7         |
| Q06828    | FMOD     | Fibromodulin                               | 43.2     | 7          | 21.0         |
| P01857    | IGHG1    | Ig gamma-1 chain C region                  | 36.1     | 7          | 26.4         |
| P08779    | KRT16    | Keratin, type I cytoskeletal 16            | 51.2     | 7          | 14.6         |
| P20774    | OGN      | Mimecan                                    | 33.9     | 7          | 25.2         |
| P01009    | SERPINA1 | Alpha-1-antitrypsin                        | 46.7     | 7          | 14.6         |
| O60687    | SRPX2    | Sushi repeat-containing protein SRPX2      | 52.9     | 7          | 20.6         |
| P35443    | THBS4    | Thrombospondin-4                           | 105.8    | 7          | 11.4         |
| P0C0L4    | C4A      | Complement C4-A                            | 192.7    | 6          | 4.4          |
| P00751    | CFB      | Complement factor B                        | 85.5     | 6          | 11.0         |
| P08603    | CFH      | Complement factor H                        | 139.0    | 6          | 6.6          |
| P00738    | HP       | Haptoglobin                                | 45.2     | 6          | 18.0         |
| P00338    | LDHA     | L-lactate dehydrogenase A chain            | 36.7     | 6          | 19.3         |
| Q08431    | MFGE8    | Lactadherin                                | 43.1     | 6          | 19.9         |
| P22105    | TNXB     | Tenascin-X                                 | 464.0    | 6          | 3.3          |
| P04083    | ANXA1    | Annexin A1                                 | 38.7     | 5          | 18.8         |
| P02743    | APCS     | Serum amyloid P-component                  | 25.4     | 5          | 23.8         |
| Q8IUL8    | CILP2    | Cartilage intermediate layer protein 2     | 126.2    | 5          | 5.4          |
| P04406    | GAPDH    | Glyceraldehyde-3-phosphate dehydrogenase   | 36.0     | 5          | 23.3         |
| P68871    | HBB      | Hemoglobin subunit beta                    | 16.0     | 5          | 46.9         |
| P01859    | IGHG2    | Ig gamma-2 chain C region                  | 35.9     | 5          | 16.6         |
| P01860    | IGHG3    | Ig gamma-3 chain C region                  | 41.3     | 5          | 14.3         |
| Q15113    | PCOLCE   | Procollagen C-endopeptidase enhancer 1     | 47.9     | 5          | 16.5         |
| P36955    | SERPINF1 | Pigment epithelium-derived factor          | 46.3     | 5          | 13.6         |
| P08294    | SOD3     | Extracellular superoxide dismutase [Cu-Zn] | 25.8     | 5          | 30.0         |
| P02760    | AMBP     | Protein AMBP                               | 39.0     | 4          | 15.9         |
| P02649    | APOE     | Apolipoprotein E                           | 36.1     | 4          | 13.2         |
| Q9BXN1    | ASPN     | Asporin                                    | 43.4     | 4          | 11.1         |
| P05452    | CLEC3B   | Tetranectin                                | 22.5     | 4          | 24.3         |

| Accession | Gene ID   | Description                                           | MW [kDa] | Peptides # | Coverage (%) |
|-----------|-----------|-------------------------------------------------------|----------|------------|--------------|
| O60814    | HIST1H2BK | Histone H2B type 1-K                                  | 13.9     | 4          | 34.9         |
| P01876    | IGHA1     | Ig alpha-1 chain C region                             | 37.6     | 4          | 13.0         |
| Q5XKE5    | KRT79     | Keratin, type II cytoskeletal 79                      | 57.8     | 4          | 6.9          |
| P61626    | LYZ       | Lysozyme C                                            | 16.5     | 4          | 26.4         |
| O15232    | MATN3     | Matrilin-3                                            | 52.8     | 4          | 11.9         |
| P04004    | VTN       | Vitronectin                                           | 54.3     | 4          | 11.1         |
| Q562R1    | ACTBL2    | Beta-actin-like protein 2                             | 42.0     | 3          | 11.2         |
| P36222    | CHI3L1    | Chitinase-3-like protein 1                            | 42.6     | 3          | 11.5         |
| P02679    | FGG       | Fibrinogen gamma chain                                | 51.5     | 3          | 7.7          |
| P69905    | HBA2      | Hemoglobin subunit alpha                              | 15.2     | 3          | 25.4         |
| P16402    | HIST1H1D  | Histone H1.3                                          | 22.3     | 3          | 14.5         |
| P02790    | HPX       | Hemopexin                                             | 51.6     | 3          | 9.3          |
| P08107    | HSPA1B    | Heat shock 70 kDa protein 1A/1B                       | 70.0     | 3          | 6.1          |
| P11021    | HSPA5     | 78 kDa glucose-regulated protein                      | 72.3     | 3          | 6.3          |
| P11142    | HSPA8     | Heat shock cognate 71 kDa protein                     | 70.9     | 3          | 6.2          |
| P01834    | IGKC      | Ig kappa chain C region                               | 11.6     | 3          | 51.9         |
| P13646    | KRT13     | Keratin, type I cytoskeletal 13                       | 49.6     | 3          | 6.6          |
| Q86Y46    | KRT73     | Keratin, type II cytoskeletal 73                      | 58.9     | 3          | 5.0          |
| Q06830    | PRDX1     | Peroxiredoxin-1                                       | 22.1     | 3          | 15.6         |
| P34096    | RNASE4    | Ribonuclease 4                                        | 16.8     | 3          | 19.7         |
| P01011    | SERPINA3  | Alpha-1-antichymotrypsin                              | 47.6     | 3          | 10.9         |
| P01008    | SERPINC1  | Antithrombin-III                                      | 52.6     | 3          | 8.8          |
| Q15582    | TGFBI     | Transforming growth factor-beta-induced protein ig-h3 | 74.6     | 3          | 5.3          |
| Q7Z7G0    | ABI3BP    | Target of Nesh-SH3                                    | 118.6    | 2          | 2.1          |
| P03950    | ANG       | Angiogenin                                            | 16.5     | 2          | 10.9         |
| P08758    | ANXA5     | Annexin A5                                            | 35.9     | 2          | 5.3          |
| P81605    | DCD       | Dermcidin                                             | 11.3     | 2          | 12.7         |
| Q05639    | EEF1A2    | Elongation factor 1-alpha 2                           | 50.4     | 2          | 4.1          |
| P02671    | FGA       | Fibrinogen alpha chain                                | 94.9     | 2          | 3.3          |
| P02794    | FTH1      | Ferritin heavy chain                                  | 21.2     | 2          | 12.0         |
| P02792    | FTL       | Ferritin light chain                                  | 20.0     | 2          | 12.6         |
| P16104    | H2AFX     | Histone H2AX                                          | 15.1     | 2          | 11.2         |
| P02042    | HBD       | Hemoglobin subunit delta                              | 16.0     | 2          | 17.0         |
| P68431    | HIST1H3F  | Histone H3.1                                          | 15.4     | 2          | 11.8         |
| P62805    | HIST1H4A  | Histone H4                                            | 11.4     | 2          | 21.4         |
| P08238    | HSP90AB1  | Heat shock protein HSP 90-beta                        | 83.2     | 2          | 3.6          |
| P14625    | HSP90B1   | Endoplasmic                                           | 92.4     | 2          | 3.2          |
| Q92743    | HTRA1     | Serine protease HTRA1                                 | 51.3     | 2          | 4.6          |
| P0CF74    | IGLC6     | Ig lambda-6 chain C region                            | 11.3     | 2          | 32.1         |
| P12036    | NEFH      | Neurofilament heavy polypeptide                       | 112.4    | 2          | 1.7          |
| Q9UKZ9    | PCOLCE2   | Procollagen C-endopeptidase enhancer 2                | 45.7     | 2          | 6.0          |
| P14555    | PLA2G2A   | Phospholipase A2, membrane associated                 | 16.1     | 2          | 19.4         |
| P62937    | PPIA      | Peptidyl-prolyl cis-trans isomerase A                 | 18.0     | 2          | 10.9         |
| P07998    | RNASE1    | Ribonuclease pancreatic                               | 17.6     | 2          | 17.9         |
| P62979    | RPS27A    | Ubiquitin-40S ribosomal protein S27a                  | 18.0     | 2          | 16.0         |
| P05155    | SERPING1  | Plasma protease C1 inhibitor                          | 55.1     | 2          | 4.2          |
| P01620    |           | Ig kappa chain V-III region SIE                       | 11.8     | 2          | 24.8         |
| Q8IUX7    | AEBP1     | Adipocyte enhancer-binding protein 1                  | 130.8    | 1          | 0.9          |
| P00568    | AK1       | Adenylate kinase isoenzyme 1                          | 21.6     | 1          | 5.2          |
| P04075    | ALDOA     | Fructose-bisphosphate aldolase A                      | 39.4     | 1          | 3.8          |
| P09972    | ALDOC     | Fructose-bisphosphate aldolase C                      | 39.4     | 1          | 6.3          |
| P09525    | ANXA4     | Annexin A4                                            | 35.9     | 1          | 3.8          |
| P06727    | APOA4     | Apolipoprotein A-IV                                   | 45.4     | 1          | 2.8          |
| P02746    | C1QB      | Complement C1q subcomponent subunit B                 | 26.7     | 1          | 5.5          |
| P00746    | CFD       | Complement factor D                                   | 27.0     | 1          | 8.7          |
| Q9Y240    | CLEC11A   | C-type lectin domain family 11 member A               | 35.7     | 1          | 2.8          |
| P13942    | COL11A2   | Collagen alpha-2(XI) chain                            | 171.7    | 1          | 0.6          |
| P05997    | COL5A2    | Collagen alpha-2(V) chain                             | 144.8    | 1          | 1.0          |
| Q14050    | COL9A3    | Collagen alpha-3(IX) chain                            | 63.6     | 1          | 1.8          |
| Q8IWT3    | CUL9      | Cullin-9                                              | 281.0    | 1          | 1.7          |
| Q07507    | DPT       | Dermatopontin                                         | 24.0     | 1          | 4.0          |

| Accession | Gene ID  | Description                                                          | MW [kDa] | Peptides # | Coverage (%) |
|-----------|----------|----------------------------------------------------------------------|----------|------------|--------------|
| P23142    | FBLN1    | Fibulin-1                                                            | 77.2     | 1          | 1.7          |
| Q9BYJ0    | FGFBP2   | Fibroblast growth factor-binding protein 2                           | 24.6     | 1          | 9.0          |
| P21802    | FGFR2    | Fibroblast growth factor receptor 2                                  | 92.0     | 1          | 3.7          |
| Q13642    | FHL1     | Four and a half LIM domains protein 1                                | 36.2     | 1          | 3.7          |
| Q5D862    | FLG2     | Filaggrin-2                                                          | 247.9    | 1          | 0.5          |
| Q92765    | FRZB     | Secreted frizzled-related protein 3                                  | 36.2     | 1          | 3.4          |
| P06744    | GPI      | Glucose-6-phosphate isomerase                                        | 63.1     | 1          | 1.6          |
| P04196    | HRG      | Histidine-rich glycoprotein                                          | 59.5     | 1          | 2.7          |
| Q86YZ3    | HRNR     | Hornerin                                                             | 282.2    | 1          | 2.8          |
| P98160    | HSPG2    | Basement membrane-specific heparan sulfate proteoglycan core protein | 468.5    | 1          | 0.3          |
| P19827    | ITIH1    | Inter-alpha-trypsin inhibitor heavy chain H1                         | 101.3    | 1          | 1.3          |
| P19823    | ITIH2    | Inter-alpha-trypsin inhibitor heavy chain H2                         | 106.4    | 1          | 1.6          |
| Q14624    | ITIH4    | Inter-alpha-trypsin inhibitor heavy chain H4                         | 103.3    | 1          | 1.3          |
| Q5TB80    | KIAA1009 | Centrosomal protein of 162 kDa                                       | 161.8    | 1          | 0.4          |
| P01042    | KNG1     | Kininogen-1                                                          | 71.9     | 1          | 2.2          |
| P07195    | LDHB     | L-lactate dehydrogenase B chain                                      | 36.6     | 1          | 4.8          |
| P01593    |          | Ig kappa chain V-I region AG                                         | 12.0     | 1          | 16.7         |
| P08493    | MGP      | Matrix Gla protein                                                   | 12.3     | 1          | 10.7         |
| P03956    | MMP1     | Interstitial collagenase                                             | 54.0     | 1          | 3.0          |
| P30101    | PDIA3    | Protein disulfide-isomerase A3                                       | 56.7     | 1          | 2.2          |
| P07737    | PFN1     | Profilin-1                                                           | 15.0     | 1          | 10.0         |
| P36871    | PGM1     | Phosphoglucomutase-1                                                 | 61.4     | 1          | 2.7          |
| P12273    | PIP      | Prolactin-inducible protein                                          | 16.6     | 1          | 7.5          |
| Q92954    | PRG4     | Proteoglycan 4                                                       | 151.0    | 1          | 0.8          |
| P35030    | PRSS3    | Trypsin-3                                                            | 32.5     | 1          | 4.3          |
| P05387    | RPLP2    | 60S acidic ribosomal protein P2                                      | 11.7     | 1          | 28.7         |
| P05109    | S100A8   | Protein S100-A8                                                      | 10.8     | 1          | 22.6         |
| Q9Y3Z3    | SAMHD1   | Deoxynucleoside triphosphate triphosphohydrolase SAMHD1              | 72.2     | 1          | 1.6          |
| A6NMB1    | SIGLEC16 | Sialic acid-binding Ig-like lectin 16                                | 53.0     | 1          | 1.5          |
| Q9H3U7    | SMOC2    | SPARC-related modular calcium-binding protein 2                      | 49.6     | 1          | 4.0          |
| P78539    | SRPX     | Sushi repeat-containing protein SRPX                                 | 51.5     | 1          | 2.6          |
| P01033    | TIMP1    | Metalloproteinase inhibitor 1                                        | 23.2     | 1          | 5.8          |
| P29401    | TKT      | Transketolase                                                        | 67.8     | 1          | 2.9          |
| P06753    | TPM3     | Tropomyosin alpha-3 chain                                            | 32.9     | 1          | 3.5          |
| Q9Y4K3    | TRAF6    | TNF receptor-associated factor 6                                     | 59.5     | 1          | 4.8          |
| P68363    | TUBA1B   | Tubulin alpha-1B chain                                               | 50.1     | 1          | 3.3          |
| Q13509    | TUBB3    | Tubulin beta-3 chain                                                 | 50.4     | 1          | 3.3          |
| Q6UXI7    | VIT      | Vitrin                                                               | 73.9     | 1          | 1.6          |
| P63104    | YWHAZ    | 14-3-3 protein zeta/delta                                            | 27.7     | 1          | 5.7          |
| P01597    |          | Ig kappa chain V-I region DEE                                        | 11.7     | 1          | 16.7         |
| P01772    |          | Ig heavy chain V-III region KOL                                      | 13.7     | 1          | 12.7         |
| P01766    |          | Ig heavy chain V-III region BRO                                      | 13.2     | 1          | 15.8         |
| P06326    |          | Ig heavy chain V-I region Mot                                        | 13.6     | 1          | 9.6          |
| P06310    |          | Ig kappa chain V-II region RPMI 6410                                 | 14.7     | 1          | 9.8          |
| P01699    |          | Ig lambda chain V-I region VOR                                       | 11.5     | 1          | 15.3         |

**Table S4. Proteins identified in discovery assay**

| Accession | Gene ID | Description                                                          | MW [kDa] | # Peptides | Coverage (%) |
|-----------|---------|----------------------------------------------------------------------|----------|------------|--------------|
| P22105    | TNXB    | Tenascin-X                                                           | 464.0    | 86         | 30.6         |
| P02751    | FN1     | Fibronectin                                                          | 262.5    | 83         | 54.9         |
| P12111    | COL6A3  | Collagen alpha-3(VI) chain                                           | 343.5    | 82         | 34.8         |
| Q99715    | COL12A1 | Collagen alpha-1(XII) chain                                          | 332.9    | 65         | 31.9         |
| P02458    | COL2A1  | Collagen alpha-1(II) chain                                           | 141.7    | 61         | 63.0         |
| P24821    | TNC     | Tenascin                                                             | 240.7    | 60         | 41.9         |
| P01024    | C3      | Complement C3                                                        | 187.0    | 56         | 42.5         |
| P07996    | THBS1   | Thrombospondin-1                                                     | 129.3    | 50         | 56.0         |
| P49747    | COMP    | Cartilage oligomeric matrix protein                                  | 82.8     | 49         | 77.1         |
| P02461    | COL3A1  | Collagen alpha-1(III) chain                                          | 138.5    | 49         | 55.1         |
| P98160    | HSPG2   | Basement membrane-specific heparan sulfate proteoglycan core protein | 468.5    | 45         | 16.4         |
| P02768    | ALB     | Serum albumin                                                        | 69.3     | 44         | 70.1         |
| P16112    | ACAN    | Aggrecan core protein                                                | 250.0    | 40         | 19.3         |
| O75339    | CILP    | Cartilage intermediate layer protein 1                               | 132.5    | 40         | 38.9         |
| Q8IUL8    | CILP2   | Cartilage intermediate layer protein 2                               | 126.2    | 37         | 43.5         |
| P02452    | COL1A1  | Collagen alpha-1(I) chain                                            | 138.9    | 36         | 43.4         |
| P08603    | CFH     | Complement factor H                                                  | 139.0    | 35         | 39.6         |
| P08123    | COL1A2  | Collagen alpha-2(I) chain                                            | 129.2    | 34         | 47.8         |
| P35555    | FBN1    | Fibrillin-1                                                          | 312.0    | 31         | 16.3         |
| P02787    | TF      | Serotransferrin                                                      | 77.0     | 30         | 51.7         |
| P0C0L5    | C4B     | Complement C4-B                                                      | 192.6    | 30         | 23.3         |
| P0C0L4    | C4A     | Complement C4-A                                                      | 192.7    | 29         | 22.5         |
| P08670    | VIM     | Vimentin                                                             | 53.6     | 26         | 57.1         |
| P35443    | THBS4   | Thrombospondin-4                                                     | 105.8    | 25         | 44.0         |
| P04264    | KRT1    | Keratin, type II cytoskeletal 1                                      | 66.0     | 24         | 51.6         |
| P02675    | FGB     | Fibrinogen beta chain                                                | 55.9     | 24         | 66.4         |
| P10915    | HAPLN1  | Hyaluronan and proteoglycan link protein 1                           | 40.1     | 23         | 77.7         |
| P12110    | COL6A2  | Collagen alpha-2(VI) chain                                           | 108.5    | 22         | 30.7         |
| P02788    | LTF     | Lactotransferrin                                                     | 78.1     | 22         | 39.3         |
| P12109    | COL6A1  | Collagen alpha-1(VI) chain                                           | 108.5    | 21         | 31.3         |
| P14618    | PKM     | Pyruvate kinase PKM                                                  | 57.9     | 21         | 54.0         |
| O15232    | MATN3   | Matrilin-3                                                           | 52.8     | 21         | 61.1         |
| P13645    | KRT10   | Keratin, type I cytoskeletal 10                                      | 58.8     | 21         | 40.6         |
| P02545    | LMNA    | Prelamin-A/C                                                         | 74.1     | 21         | 34.3         |
| P02679    | FGG     | Fibrinogen gamma chain                                               | 51.5     | 20         | 62.3         |
| Q15582    | TGFBI   | Transforming growth factor-beta-induced protein ig-h3                | 74.6     | 20         | 41.7         |
| P21810    | BGN     | Biglycan                                                             | 41.6     | 19         | 60.6         |
| P51888    | PRELP   | Prolargin                                                            | 43.8     | 19         | 56.3         |
| P10909    | CLU     | Clusterin                                                            | 52.5     | 19         | 35.6         |
| P02671    | FGA     | Fibrinogen alpha chain                                               | 94.9     | 19         | 28.6         |
| Q08431    | MFGE8   | Lactadherin                                                          | 43.1     | 18         | 58.4         |
| P35527    | KRT9    | Keratin, type I cytoskeletal 9                                       | 62.0     | 18         | 53.6         |
| P00747    | PLG     | Plasminogen                                                          | 90.5     | 17         | 34.1         |
| P04083    | ANXA1   | Annexin A1                                                           | 38.7     | 16         | 53.8         |
| P08254    | MMP3    | Stromelysin-1                                                        | 53.9     | 16         | 31.4         |
| P07355    | ANXA2   | Annexin A2                                                           | 38.6     | 16         | 51.9         |
| Q7Z7G0    | ABI3BP  | Target of Nesh-SH3                                                   | 118.6    | 16         | 20.1         |
| P13942    | COL11A2 | Collagen alpha-2(XI) chain                                           | 171.7    | 16         | 14.7         |
| P23352    | KAL1    | Anosmin-1                                                            | 76.1     | 16         | 35.3         |
| P07585    | DCN     | Decorin                                                              | 39.7     | 15         | 54.3         |
| O60687    | SRPX2   | Sushi repeat-containing protein SRPX2                                | 52.9     | 15         | 44.7         |
| P06396    | GSN     | Gelsolin                                                             | 85.6     | 15         | 33.9         |
| P08253    | MMP2    | 72 kDa type IV collagenase                                           | 73.8     | 15         | 30.0         |
| Q6UWX4    | HHIPL2  | HHIP-like protein 2                                                  | 80.7     | 15         | 26.0         |
| P00751    | CFB     | Complement factor B                                                  | 85.5     | 15         | 25.0         |
| P04406    | GAPDH   | Glyceraldehyde-3-phosphate dehydrogenase                             | 36.0     | 14         | 57.9         |
| P01857    | IGHG1   | Ig gamma-1 chain C region                                            | 36.1     | 14         | 59.4         |
| P06733    | ENO1    | Alpha-enolase                                                        | 47.1     | 14         | 45.6         |

| Q6UXI7    | VIT      | Vitrin                                                     | 73.9     | 14         | 26.5         |
|-----------|----------|------------------------------------------------------------|----------|------------|--------------|
| Q8IUX7    | AEBP1    | Adipocyte enhancer-binding protein 1                       | 130.8    | 14         | 15.8         |
| Accession | Gene ID  | Description                                                | MW [kDa] | # Peptides | Coverage (%) |
| P20774    | OGN      | Mimecan                                                    | 33.9     | 13         | 47.3         |
| P00558    | PGK1     | Phosphoglycerate kinase 1                                  | 44.6     | 13         | 46.3         |
| Q9BXN1    | ASPN     | Asporin                                                    | 43.4     | 13         | 40.3         |
| P11021    | HSPA5    | 78 kDa glucose-regulated protein                           | 72.3     | 13         | 26.8         |
| Q09666    | AHNAK    | Neuroblast differentiation-associated protein AHNAK        | 628.7    | 13         | 11.0         |
| Q06828    | FMOD     | Fibromodulin                                               | 43.2     | 12         | 38.6         |
| P51884    | LUM      | Lumican                                                    | 38.4     | 12         | 37.3         |
| Q15113    | PCOLCE   | Procollagen C-endopeptidase enhancer 1                     | 47.9     | 12         | 36.5         |
| P35908    | KRT2     | Keratin, type II cytoskeletal 2 epidermal                  | 65.4     | 12         | 23.0         |
| P00738    | HP       | Haptoglobin                                                | 45.2     | 12         | 36.2         |
| P23142    | FBLN1    | Fibulin-1                                                  | 77.2     | 12         | 28.3         |
| Q92954    | PRG4     | Proteoglycan 4                                             | 151.0    | 12         | 11.7         |
| Q15063    | POSTN    | Periostin                                                  | 93.3     | 12         | 22.0         |
| O15335    | CHAD     | Chondroadherin                                             | 40.5     | 11         | 46.8         |
| P02042    | HBD      | Hemoglobin subunit delta                                   | 16.0     | 11         | 85.7         |
| P36955    | SERPINF1 | Pigment epithelium-derived factor                          | 46.3     | 11         | 33.0         |
| Q92743    | HTRA1    | Serine protease HTRA1                                      | 51.3     | 11         | 30.8         |
| P04075    | ALDOA    | Fructose-bisphosphate aldolase A                           | 39.4     | 11         | 46.2         |
| Q9H3U7    | SMOC2    | SPARC-related modular calcium-binding protein 2            | 49.6     | 11         | 31.4         |
| P00734    | F2       | Prothrombin                                                | 70.0     | 11         | 23.3         |
| P02538    | KRT6A    | Keratin, type II cytoskeletal 6A                           | 60.0     | 11         | 20.9         |
| P06732    | CKM      | Creatine kinase M-type                                     | 43.1     | 11         | 39.6         |
| P08779    | KRT16    | Keratin, type I cytoskeletal 16                            | 51.2     | 11         | 28.1         |
| P05997    | COL5A2   | Collagen alpha-2(V) chain                                  | 144.8    | 11         | 14.2         |
| P68871    | HBB      | Hemoglobin subunit beta                                    | 16.0     | 10         | 77.6         |
| P01859    | IGHG2    | Ig gamma-2 chain C region                                  | 35.9     | 10         | 48.5         |
| Q9UKZ9    | PCOLCE2  | Procollagen C-endopeptidase enhancer 2                     | 45.7     | 10         | 32.0         |
| P01876    | IGHA1    | Ig alpha-1 chain C region                                  | 37.6     | 10         | 40.8         |
| P13611    | VCAN     | Versican core protein                                      | 372.6    | 10         | 4.4          |
| P02790    | HPX      | Hemopexin                                                  | 51.6     | 10         | 29.4         |
| P01023    | A2M      | Alpha-2-macroglobulin                                      | 163.2    | 10         | 9.2          |
| P01860    | IGHG3    | Ig gamma-3 chain C region                                  | 41.3     | 9          | 32.6         |
| O75596    | CLEC3A   | C-type lectin domain family 3 member A                     | 22.2     | 9          | 48.7         |
| P00338    | LDHA     | L-lactate dehydrogenase A chain                            | 36.7     | 9          | 32.5         |
| P60709    | ACTB     | Actin, cytoplasmic 1                                       | 41.7     | 9          | 29.1         |
| P07093    | SERPINE2 | Glia-derived nexin                                         | 44.0     | 9          | 24.6         |
| P13647    | KRT5     | Keratin, type II cytoskeletal 5                            | 62.3     | 9          | 15.8         |
| P02533    | KRT14    | Keratin, type I cytoskeletal 14                            | 51.5     | 9          | 22.2         |
| P02649    | APOE     | Apolipoprotein E                                           | 36.1     | 9          | 34.7         |
| P02748    | C9       | Complement component C9                                    | 63.1     | 9          | 21.3         |
| P14625    | HSP90B1  | Endoplasmic                                                | 92.4     | 9          | 13.4         |
| P30101    | PDIA3    | Protein disulfide-isomerase A3                             | 56.7     | 9          | 23.4         |
| P61626    | LYZ      | Lysozyme C                                                 | 16.5     | 8          | 55.4         |
| P01861    | IGHG4    | Ig gamma-4 chain C region                                  | 35.9     | 8          | 38.2         |
| Q9BYJ0    | FGFBP2   | Fibroblast growth factor-binding protein 2                 | 24.6     | 8          | 48.9         |
| P04004    | VTN      | Vitronectin                                                | 54.3     | 8          | 22.2         |
| P05452    | CLEC3B   | Tetranectin                                                | 22.5     | 8          | 42.6         |
| P01009    | SERPINA1 | Alpha-1-antitrypsin                                        | 46.7     | 8          | 26.8         |
| P04259    | KRT6B    | Keratin, type II cytoskeletal 6B                           | 60.0     | 8          | 14.5         |
| P68032    | ACTC1    | Actin, alpha cardiac muscle 1                              | 42.0     | 8          | 27.3         |
| P11142    | HSPA8    | Heat shock cognate 71 kDa protein                          | 70.9     | 8          | 16.6         |
| P36222    | CHI3L1   | Chitinase-3-like protein 1                                 | 42.6     | 8          | 26.4         |
| P19827    | ITIH1    | Inter-alpha-trypsin inhibitor heavy chain H1               | 101.3    | 8          | 13.7         |
| Q76M96    | CCDC80   | Coiled-coil domain-containing protein 80                   | 108.1    | 8          | 11.7         |
| P17213    | BPI      | Bactericidal permeability-increasing protein               | 53.9     | 8          | 24.4         |
| Q9UKU9    | ANGPTL2  | Angiopoietin-related protein 2                             | 57.1     | 8          | 19.9         |
| P55107    | GDF10    | Bone morphogenetic protein 3B                              | 53.1     | 8          | 23.0         |
| P00450    | CP       | Ceruloplasmin                                              | 122.1    | 8          | 10.0         |
| Q12805    | EFEMP1   | EGF-containing fibulin-like extracellular matrix protein 1 | 54.6     | 8          | 19.7         |

| P06727    | APOA4     | Apolipoprotein A-IV                                              | 45.4     | 8          | 26.0         |
|-----------|-----------|------------------------------------------------------------------|----------|------------|--------------|
| P19823    | ITIH2     | Inter-alpha-trypsin inhibitor heavy chain H2                     | 106.4    | 8          | 12.2         |
| Accession | Gene ID   | Description                                                      | MW [kDa] | # Peptides | Coverage (%) |
| P08294    | SOD3      | Extracellular superoxide dismutase [Cu-Zn]                       | 25.8     | 7          | 37.1         |
| P03950    | ANG       | Angiogenin                                                       | 16.5     | 7          | 53.1         |
| P14555    | PLA2G2A   | Phospholipase A2, membrane associated                            | 16.1     | 7          | 47.2         |
| Q13642    | FHL1      | Four and a half LIM domains protein 1                            | 36.2     | 7          | 31.0         |
| P08107    | HSPA1B    | Heat shock 70 kDa protein 1A/1B                                  | 70.0     | 7          | 17.8         |
| Q06830    | PRDX1     | Peroxiredoxin-1                                                  | 22.1     | 7          | 40.2         |
| P07451    | CA3       | Carbonic anhydrase 3                                             | 29.5     | 7          | 41.2         |
| P02647    | APOA1     | Apolipoprotein A-I                                               | 30.8     | 7          | 22.5         |
| P01011    | SERPINA3  | Alpha-1-antichymotrypsin                                         | 47.6     | 7          | 22.5         |
| P26038    | MSN       | Moesin                                                           | 67.8     | 7          | 10.9         |
| P13671    | C6        | Complement component C6                                          | 104.7    | 7          | 10.8         |
| P14780    | MMP9      | Matrix metalloproteinase-9                                       | 78.4     | 7          | 11.0         |
| P00736    | C1R       | Complement C1r subcomponent                                      | 80.1     | 7          | 12.6         |
| O43854    | EDIL3     | EGF-like repeat and discoidin I-like domain-containing protein 3 | 53.7     | 7          | 22.3         |
| P01834    | IGKC      | Ig kappa chain C region                                          | 11.6     | 6          | 80.2         |
| P69905    | HBA2      | Hemoglobin subunit alpha                                         | 15.2     | 6          | 57.7         |
| P02743    | APCS      | Serum amyloid P-component                                        | 25.4     | 6          | 28.7         |
| P62937    | PPIA      | Peptidyl-prolyl cis-trans isomerase A                            | 18.0     | 6          | 49.1         |
| P23284    | PPIB      | Peptidyl-prolyl cis-trans isomerase B                            | 23.7     | 6          | 30.1         |
| P68104    | EEF1A1    | Elongation factor 1-alpha 1                                      | 50.1     | 6          | 16.5         |
| P01619    |           | Ig kappa chain V-III region B6                                   | 11.6     | 6          | 16.7         |
| P01877    | IGHA2     | Ig alpha-2 chain C region                                        | 36.5     | 6          | 20.6         |
| P12107    | COL11A1   | Collagen alpha-1(XI) chain                                       | 181.0    | 6          | 6.4          |
| P20908    | COL5A1    | Collagen alpha-1(V) chain                                        | 183.4    | 6          | 5.9          |
| P09525    | ANXA4     | Annexin A4                                                       | 35.9     | 6          | 18.8         |
| Q6UXX5    | ITIH6     | Inter-alpha-trypsin inhibitor heavy chain H6                     | 143.1    | 6          | 5.6          |
| P07358    | C8B       | Complement component C8 beta chain                               | 67.0     | 6          | 15.1         |
| P34096    | RNASE4    | Ribonuclease 4                                                   | 16.8     | 5          | 34.0         |
| P30086    | PEBP1     | Phosphatidylethanolamine-binding protein 1                       | 21.0     | 5          | 52.9         |
| P02746    | C1QB      | Complement C1q subcomponent subunit B                            | 26.7     | 5          | 27.3         |
| P02775    | PPBP      | Platelet basic protein                                           | 13.9     | 5          | 38.3         |
| P02760    | AMBP      | Protein AMBP                                                     | 39.0     | 5          | 19.0         |
| P00568    | AK1       | Adenylate kinase isoenzyme 1                                     | 21.6     | 5          | 30.4         |
| P34931    | HSPA1L    | Heat shock 70 kDa protein 1-like                                 | 70.3     | 5          | 10.6         |
| O60814    | HIST1H2BK | Histone H2B type 1-K                                             | 13.9     | 5          | 35.7         |
| P06899    | HIST1H2BJ | Histone H2B type 1-J                                             | 13.9     | 5          | 35.7         |
| P13646    | KRT13     | Keratin, type I cytoskeletal 13                                  | 49.6     | 5          | 8.7          |
| P07737    | PFN1      | Profilin-1                                                       | 15.0     | 5          | 45.7         |
| P08758    | ANXA5     | Annexin A5                                                       | 35.9     | 5          | 14.4         |
| P07360    | C8G       | Complement component C8 gamma chain                              | 22.3     | 5          | 39.6         |
| Q92765    | FRZB      | Secreted frizzled-related protein 3                              | 36.2     | 5          | 16.9         |
| P30043    | BLVRB     | Flavin reductase (NADPH)                                         | 22.1     | 5          | 47.1         |
| P00746    | CFD       | Complement factor D                                              | 27.0     | 5          | 40.3         |
| P68363    | TUBA1B    | Tubulin alpha-1B chain                                           | 50.1     | 5          | 16.6         |
| P41218    | MNDA      | Myeloid cell nuclear differentiation antigen                     | 45.8     | 5          | 15.2         |
| P00918    | CA2       | Carbonic anhydrase 2                                             | 29.2     | 5          | 26.2         |
| P20849    | COL9A1    | Collagen alpha-1(IX) chain                                       | 91.8     | 5          | 9.9          |
| Q00688    | FKBP3     | Peptidyl-prolyl cis-trans isomerase FKBP3                        | 25.2     | 5          | 26.3         |
| P50454    | SERPINH1  | Serpin H1                                                        | 46.4     | 5          | 19.6         |
| P02774    | GC        | Vitamin D-binding protein                                        | 52.9     | 5          | 19.8         |
| P01871    | IGHM      | Ig mu chain C region                                             | 49.3     | 5          | 14.6         |
| P07357    | C8A       | Complement component C8 alpha chain                              | 65.1     | 5          | 13.2         |
| P29401    | TKT       | Transketolase                                                    | 67.8     | 5          | 14.3         |
| Q07092    | COL16A1   | Collagen alpha-1(XVI) chain                                      | 157.7    | 5          | 7.1          |
| P08582    | MFI2      | Melanotransferrin                                                | 80.2     | 5          | 10.0         |
| P32119    | PRDX2     | Peroxiredoxin-2                                                  | 21.9     | 5          | 28.3         |
| Q7Z304    | MAMDC2    | MAM domain-containing protein 2                                  | 77.5     | 5          | 9.5          |
| P0CG05    | IGLC2     | Ig lambda-2 chain C regions                                      | 11.3     | 4          | 65.1         |

| B9A064    | IGLL5     | Immunoglobulin lambda-like polypeptide 5                 | 23.0     | 4          | 32.2         |
|-----------|-----------|----------------------------------------------------------|----------|------------|--------------|
| P13929    | ENO3      | Beta-enolase                                             | 47.0     | 4          | 12.0         |
| Accession | Gene ID   | Description                                              | MW [kDa] | # Peptides | Coverage (%) |
| P16402    | HIST1H1D  | Histone H1.3                                             | 22.3     | 4          | 14.9         |
| P62805    | HIST1H4A  | Histone H4                                               | 11.4     | 4          | 40.8         |
| P07998    | RNASE1    | Ribonuclease pancreatic                                  | 17.6     | 4          | 48.1         |
| P04179    | SOD2      | Superoxide dismutase [Mn], mitochondrial                 | 24.7     | 4          | 23.0         |
| P02747    | C1QC      | Complement C1q subcomponent subunit C                    | 25.8     | 4          | 21.2         |
| P03973    | SLPI      | Antileukoproteinase                                      | 14.3     | 4          | 38.6         |
| P02749    | APOH      | Beta-2-glycoprotein 1                                    | 38.3     | 4          | 20.6         |
| P02776    | PF4       | Platelet factor 4                                        | 10.8     | 4          | 35.6         |
| Q9Y240    | CLEC11A   | C-type lectin domain family 11 member A                  | 35.7     | 4          | 14.2         |
| P16401    | HIST1H1B  | Histone H1.5                                             | 22.6     | 4          | 15.5         |
| P00915    | CA1       | Carbonic anhydrase 1                                     | 28.9     | 4          | 21.1         |
| P49746    | THBS3     | Thrombospondin-3                                         | 104.1    | 4          | 4.5          |
| P23528    | CFL1      | Cofilin-1                                                | 18.5     | 4          | 35.5         |
| P01033    | TIMP1     | Metalloproteinase inhibitor 1                            | 23.2     | 4          | 24.6         |
| P60174    | TP1       | Triosephosphate isomerase                                | 30.8     | 4          | 19.9         |
| P35442    | THBS2     | Thrombospondin-2                                         | 129.9    | 4          | 3.7          |
| P05090    | APOD      | Apolipoprotein D                                         | 21.3     | 4          | 24.9         |
| Q07507    | DPT       | Dermatopontin                                            | 24.0     | 4          | 25.4         |
| P35625    | TIMP3     | Metalloproteinase inhibitor 3                            | 24.1     | 4          | 20.4         |
| P05155    | SERPING1  | Plasma protease C1 inhibitor                             | 55.1     | 4          | 10.2         |
| Q9Y6C2    | EMILIN1   | EMILIN-1                                                 | 106.6    | 4          | 6.3          |
| P07437    | TUBB      | Tubulin beta chain                                       | 49.6     | 4          | 12.2         |
| P24752    | ACAT1     | Acetyl-CoA acetyltransferase, mitochondrial              | 45.2     | 4          | 18.3         |
| P21333    | FLNA      | Filamin-A                                                | 280.6    | 4          | 1.7          |
| Q14767    | LTBP2     | Latent-transforming growth factor beta-binding protein 2 | 194.9    | 4          | 3.0          |
| Q9H336    | CRISPLD1  | Cysteine-rich secretory protein LCCL domain-containing 1 | 56.9     | 4          | 9.6          |
| Q9NQ79    | CRTAC1    | Cartilage acidic protein 1                               | 71.4     | 4          | 10.0         |
| P04003    | C4BPA     | C4b-binding protein alpha chain                          | 67.0     | 4          | 7.4          |
| P01042    | KNG1      | Kininogen-1                                              | 71.9     | 4          | 6.5          |
| Q9NRN5    | OLFML3    | Olfactomedin-like protein 3                              | 46.0     | 4          | 11.3         |
| P01620    |           | Ig kappa chain V-III region SIE                          | 11.8     | 3          | 39.4         |
| P09238    | MMP10     | Stromelysin-2                                            | 54.1     | 3          | 6.1          |
| P04908    | HIST1H2AB | Histone H2A type 1-B/E                                   | 14.1     | 3          | 26.9         |
| P05787    | KRT8      | Keratin, type II cytoskeletal 8                          | 53.7     | 3          | 6.2          |
| Q562R1    | ACTBL2    | Beta-actin-like protein 2                                | 42.0     | 3          | 11.2         |
| P01597    |           | Ig kappa chain V-I region DEE                            | 11.7     | 3          | 16.7         |
| Q96HC4    | PDLIM5    | PDZ and LIM domain protein 5                             | 63.9     | 3          | 8.1          |
| P12830    | CDH1      | Cadherin-1                                               | 97.4     | 3          | 3.2          |
| Q99969    | RARRES2   | Retinoic acid receptor responder protein 2               | 18.6     | 3          | 21.5         |
| P16035    | TIMP2     | Metalloproteinase inhibitor 2                            | 24.4     | 3          | 14.5         |
| P02794    | FTH1      | Ferritin heavy chain                                     | 21.2     | 3          | 19.1         |
| Q14050    | COL9A3    | Collagen alpha-3(IX) chain                               | 63.6     | 3          | 9.4          |
| P02792    | FTL       | Ferritin light chain                                     | 20.0     | 3          | 21.1         |
| P21246    | PTN       | Pleiotrophin                                             | 18.9     | 3          | 23.8         |
| P12724    | RNASE3    | Eosinophil cationic protein                              | 18.4     | 3          | 15.0         |
| P01625    |           | Ig kappa chain V-IV region Len                           | 12.6     | 3          | 36.8         |
| P01768    |           | Ig heavy chain V-III region CAM                          | 13.7     | 3          | 18.0         |
| P18428    | LBP       | Lipopolysaccharide-binding protein                       | 53.4     | 3          | 7.1          |
| Q96PD5    | PGLYRP2   | N-acetylmuramoyl-L-alanine amidase                       | 62.2     | 3          | 11.3         |
| P08238    | HSP90AB1  | Heat shock protein HSP 90-beta                           | 83.2     | 3          | 5.0          |
| P84243    | H3F3A     | Histone H3.3                                             | 15.3     | 3          | 35.3         |
| P78539    | SRPX      | Sushi repeat-containing protein SRPX                     | 51.5     | 3          | 7.5          |
| P03956    | MMP1      | Interstitial collagenase                                 | 54.0     | 3          | 7.2          |
| Q16851    | UGP2      | UTP--glucose-1-phosphate uridylyltransferase             | 56.9     | 3          | 6.9          |
| P06702    | S100A9    | Protein S100-A9                                          | 13.2     | 3          | 37.7         |
| Q14055    | COL9A2    | Collagen alpha-2(IX) chain                               | 65.1     | 3          | 11.5         |
| P04792    | HSPB1     | Heat shock protein beta-1                                | 22.8     | 3          | 21.0         |
| P18669    | PGAM1     | Phosphoglycerate mutase 1                                | 28.8     | 3          | 18.9         |



| Q96CG8    | CTHRC1       | Collagen triple helix repeat-containing protein 1     | 26.2     | 3          | 13.2         |
|-----------|--------------|-------------------------------------------------------|----------|------------|--------------|
| Q99983    | OMD          | Osteomodulin                                          | 49.5     | 3          | 7.6          |
| Accession | Gene ID      | Description                                           | MW [kDa] | # Peptides | Coverage (%) |
| Q16674    | MIA          | Melanoma-derived growth regulatory protein            | 14.5     | 3          | 21.4         |
| P27918    | CFP          | Properdin                                             | 51.2     | 3          | 9.4          |
| Q16627    | CCL14        | C-C motif chemokine 14                                | 10.7     | 3          | 47.3         |
| P12883    | MYH7         | Myosin-7                                              | 223.0    | 3          | 2.2          |
| P09871    | C1S          | Complement C1s subcomponent                           | 76.6     | 3          | 6.1          |
| Q16610    | ECM1         | Extracellular matrix protein 1                        | 60.6     | 3          | 6.5          |
| P01008    | SERPINC1     | Antithrombin-III                                      | 52.6     | 3          | 7.8          |
| P27797    | CALR         | Calreticulin                                          | 48.1     | 3          | 12.2         |
| Q7Z794    | KRT77        | Keratin, type II cytoskeletal 1b                      | 61.9     | 2          | 3.8          |
| Q86UW8    | HAPLN4       | Hyaluronan and proteoglycan link protein 4            | 42.8     | 2          | 4.0          |
| P19013    | KRT4         | Keratin, type II cytoskeletal 4                       | 57.3     | 2          | 3.7          |
| P01609    |              | Ig kappa chain V-I region Scw                         | 11.8     | 2          | 27.8         |
| P01593    | LOC100128009 | Ig kappa chain V-I region AG                          | 12.0     | 2          | 31.5         |
| P01766    |              | Ig heavy chain V-III region BRO                       | 13.2     | 2          | 25.0         |
| P01608    |              | Ig kappa chain V-I region Roy                         | 11.8     | 2          | 24.1         |
| P09972    | ALDOC        | Fructose-bisphosphate aldolase C                      | 39.4     | 2          | 13.7         |
| O14960    | LECT2        | Leukocyte cell-derived chemotaxin-2                   | 16.4     | 2          | 11.3         |
| P01616    |              | Ig kappa chain V-II region MIL                        | 12.0     | 2          | 11.6         |
| P62979    | RPS27A       | Ubiquitin-40S ribosomal protein S27a                  | 18.0     | 2          | 16.0         |
| O00300    | TNFRSF11B    | Tumor necrosis factor receptor superfamily member 11B | 46.0     | 2          | 5.7          |
| P02766    | TTR          | Transthyretin                                         | 15.9     | 2          | 23.8         |
| Q03591    | CFHR1        | Complement factor H-related protein 1                 | 37.6     | 2          | 7.3          |
| P59665    | DEFA1        | Neutrophil defensin 1                                 | 10.2     | 2          | 19.1         |
| P80748    |              | Ig lambda chain V-III region LOI                      | 11.9     | 2          | 21.6         |
| Q92522    | H1FX         | Histone H1x                                           | 22.5     | 2          | 10.3         |
| O75829    | LECT1        | Leukocyte cell-derived chemotaxin 1                   | 37.1     | 2          | 9.3          |
| P01765    |              | Ig heavy chain V-III region TIL                       | 12.3     | 2          | 26.1         |
| Q9H1Z8    | C2orf40      | Augurin                                               | 17.2     | 2          | 14.9         |
| P04208    |              | Ig lambda chain V-I region WAH                        | 11.7     | 2          | 27.5         |
| P02144    | MB           | Myoglobin                                             | 17.2     | 2          | 18.8         |
| P02745    | C1QA         | Complement C1q subcomponent subunit A                 | 26.0     | 2          | 9.4          |
| P06331    |              | Ig heavy chain V-II region ARH-77                     | 16.2     | 2          | 17.1         |
| Q14315    | FLNC         | Filamin-C                                             | 290.8    | 2          | 0.9          |
| P05387    | RPLP2        | 60S acidic ribosomal protein P2                       | 11.7     | 2          | 39.1         |
| P07195    | LDHB         | L-lactate dehydrogenase B chain                       | 36.6     | 2          | 6.3          |
| P01701    |              | Ig lambda chain V-I region NEW                        | 11.4     | 2          | 27.0         |
| Q15323    | KRT31        | Keratin, type I cuticular Ha1                         | 47.2     | 2          | 5.3          |
| P01598    |              | Ig kappa chain V-I region EU                          | 11.8     | 2          | 26.9         |
| P09211    | GSTP1        | Glutathione S-transferase P                           | 23.3     | 2          | 14.8         |
| P62424    | RPL7A        | 60S ribosomal protein L7a                             | 30.0     | 2          | 9.0          |
| P45378    | TNNT3        | Troponin T, fast skeletal muscle                      | 31.8     | 2          | 8.2          |
| P02763    | ORM1         | Alpha-1-acid glycoprotein 1                           | 23.5     | 2          | 8.5          |
| P08493    | MGP          | Matrix Gla protein                                    | 12.3     | 2          | 11.7         |
| P24593    | IGFBP5       | Insulin-like growth factor-binding protein 5          | 30.6     | 2          | 7.0          |
| P04040    | CAT          | Catalase                                              | 59.7     | 2          | 5.3          |
| P67936    | TPM4         | Tropomyosin alpha-4 chain                             | 28.5     | 2          | 9.7          |
| P28300    | LOX          | Protein-lysine 6-oxidase                              | 46.9     | 2          | 7.9          |
| P39059    | COL15A1      | Collagen alpha-1(XV) chain                            | 141.6    | 2          | 2.2          |
| P09429    | HMGB1        | High mobility group protein B1                        | 24.9     | 2          | 15.3         |
| P05109    | S100A8       | Protein S100-A8                                       | 10.8     | 2          | 23.7         |
| Q14624    | ITIH4        | Inter-alpha-trypsin inhibitor heavy chain H4          | 103.3    | 2          | 2.3          |
| P21741    | MDK          | Midkine                                               | 15.6     | 2          | 16.8         |
| P45452    | MMP13        | Collagenase 3                                         | 53.8     | 2          | 8.3          |
| Q8WZ42    | TTN          | Titin                                                 | 3813.7   | 2          | 0.1          |
| P62258    | YWHAE        | 14-3-3 protein epsilon                                | 29.2     | 2          | 7.5          |
| Q9BXR6    | CFHR5        | Complement factor H-related protein 5                 | 64.4     | 2          | 4.0          |
| P04196    | HRG          | Histidine-rich glycoprotein                           | 59.5     | 2          | 4.0          |
| Q15198    | PDGFRL       | Platelet-derived growth factor receptor-like protein  | 41.8     | 2          | 6.1          |
| P20160    | AZU1         | Azurocidin                                            | 26.9     | 2          | 8.4          |

| O75888    | TNFSF13     | Tumor necrosis factor ligand superfamily member 13          | 27.4     | 2          | 9.6          |
|-----------|-------------|-------------------------------------------------------------|----------|------------|--------------|
| P09651    | HNRNPA1     | Heterogeneous nuclear ribonucleoprotein A1                  | 38.7     | 2          | 4.8          |
| Accession | Gene ID     | Description                                                 | MW [kDa] | # Peptides | Coverage (%) |
| P36871    | PGM1        | Phosphoglucomutase-1                                        | 61.4     | 2          | 4.8          |
| P26583    | HMGB2       | High mobility group protein B2                              | 24.0     | 2          | 11.5         |
| P02741    | CRP         | C-reactive protein                                          | 25.0     | 2          | 11.2         |
| P00488    | F13A1       | Coagulation factor XIII A chain                             | 83.2     | 2          | 3.8          |
| P06744    | GPI         | Glucose-6-phosphate isomerase                               | 63.1     | 2          | 4.1          |
| P10643    | C7          | Complement component C7                                     | 93.5     | 2          | 4.9          |
| P22626    | HNRNPA2B1   | Heterogeneous nuclear ribonucleoproteins A2/B1              | 37.4     | 2          | 8.5          |
| P62269    | RPS18       | 40S ribosomal protein S18                                   | 17.7     | 2          | 12.5         |
| P05546    | SERPIND1    | Heparin cofactor 2                                          | 57.0     | 2          | 3.2          |
| P07305    | H1FO        | Histone H1.0                                                | 20.9     | 1          | 6.7          |
| P06326    |             | Ig heavy chain V-I region Mot                               | 13.6     | 1          | 9.6          |
| P01762    |             | Ig heavy chain V-III region TRO                             | 13.5     | 1          | 15.6         |
| Q14103    | HNRNPD      | Heterogeneous nuclear ribonucleoprotein D0                  | 38.4     | 1          | 3.9          |
| P01772    |             | Ig heavy chain V-III region KOL                             | 13.7     | 1          | 12.7         |
| P01714    |             | Ig lambda chain V-III region SH                             | 11.4     | 1          | 16.7         |
| P01743    | LOC652102   | Ig heavy chain V-I region HG3                               | 12.9     | 1          | 9.4          |
| P01781    |             | Ig heavy chain V-III region GAL                             | 12.7     | 1          | 7.8          |
| Q5JSP0    | FGD3        | FYVE, RhoGEF and PH domain-containing protein 3             | 79.4     | 1          | 1.2          |
| P48061    | CXCL12      | Stromal cell-derived factor 1                               | 10.7     | 1          | 15.1         |
| P35268    | RPL22       | 60S ribosomal protein L22                                   | 14.8     | 1          | 8.6          |
| P04433    | IGKV3D-11   | Ig kappa chain V-III region VG (Fragment)                   | 12.6     | 1          | 7.8          |
| P01034    | CST3        | Cystatin-C                                                  | 15.8     | 1          | 7.5          |
| Q6NZI2    | PTRF        | Polymerase I and transcript release factor                  | 43.5     | 1          | 4.6          |
| P23083    | IGHV1OR15-1 | Ig heavy chain V-I region V35                               | 13.0     | 1          | 10.3         |
| P05976    | MYL1        | Myosin light chain 1/3, skeletal muscle isoform             | 21.1     | 1          | 5.7          |
| Q01523    | DEFA5       | Defensin-5                                                  | 10.1     | 1          | 12.8         |
| O00339    | MATN2       | Matrilin-2                                                  | 106.8    | 1          | 1.2          |
| P81605    | DCD         | Dermcidin                                                   | 11.3     | 1          | 10.0         |
| P05019    | IGF1        | Insulin-like growth factor I                                | 21.8     | 1          | 5.1          |
| P62753    | RPS6        | 40S ribosomal protein S6                                    | 28.7     | 1          | 6.0          |
| O95965    | ITGBL1      | Integrin beta-like protein 1                                | 53.9     | 1          | 2.8          |
| Q93091    | RNASE6      | Ribonuclease K6                                             | 17.2     | 1          | 7.3          |
| Q9UGM3    | DMBT1       | Deleted in malignant brain tumors 1 protein                 | 260.6    | 1          | 7.0          |
| P07477    | PRSS1       | Trypsin-1                                                   | 26.5     | 1          | 4.0          |
| P62826    | RAN         | GTP-binding nuclear protein Ran                             | 24.4     | 1          | 5.1          |
| P04207    |             | Ig kappa chain V-III region CLL                             | 14.3     | 1          | 7.0          |
| P61158    | ACTR3       | Actin-related protein 3                                     | 47.3     | 1          | 2.6          |
| O14950    | MYL12B      | Myosin regulatory light chain 12B                           | 19.8     | 1          | 6.4          |
| P01621    |             | Ig kappa chain V-III region NG9 (Fragment)                  | 10.7     | 1          | 9.0          |
| Q6YHK3    | CD109       | CD109 antigen                                               | 161.6    | 1          | 1.2          |
| P05156    | CFI         | Complement factor I                                         | 65.7     | 1          | 1.7          |
| P20962    | PTMS        | Parathyromosin                                              | 11.5     | 1          | 10.8         |
| Q14766    | LTBP1       | Latent-transforming growth factor beta-binding protein 1    | 186.7    | 1          | 0.7          |
| P83731    | RPL24       | 60S ribosomal protein L24                                   | 17.8     | 1          | 8.3          |
| Q6UWY5    | OLFML1      | Olfactomedin-like protein 1                                 | 45.9     | 1          | 2.7          |
| Q53RD9    | FBLN7       | Fibulin-7                                                   | 47.3     | 1          | 1.6          |
| P40121    | CAPG        | Macrophage-capping protein                                  | 38.5     | 1          | 3.4          |
| P09913    | IFIT2       | Interferon-induced protein with tetratricopeptide repeats 2 | 54.6     | 1          | 2.5          |
| Q16658    | FSCN1       | Fascin                                                      | 54.5     | 1          | 3.2          |
| P01703    |             | Ig lambda chain V-I region NEWM                             | 10.9     | 1          | 16.5         |
| P55774    | CCL18       | C-C motif chemokine 18                                      | 9.8      | 1          | 24.7         |
| Q9NT22    | EMILIN3     | EMILIN-3                                                    | 82.6     | 1          | 2.5          |
| O60701    | UGDH        | UDP-glucose 6-dehydrogenase                                 | 55.0     | 1          | 2.0          |
| P19338    | NCL         | Nucleolin                                                   | 76.6     | 1          | 1.7          |
| P47755    | CAPZA2      | F-actin-capping protein subunit alpha-2                     | 32.9     | 1          | 3.5          |
| P23297    | S100A1      | Protein S100-A1                                             | 10.5     | 1          | 16.0         |
| P05164    | MPO         | Myeloperoxidase                                             | 83.8     | 1          | 1.6          |
| P0DJ18    | SAA1        | Serum amyloid A-1 protein                                   | 13.5     | 1          | 16.4         |

| P62314    | SNRPD1   | Small nuclear ribonucleoprotein Sm D1                        | 13.3     | 1          | 16.8         |
|-----------|----------|--------------------------------------------------------------|----------|------------|--------------|
| Q15782    | CHI3L2   | Chitinase-3-like protein 2                                   | 43.5     | 1          | 2.8          |
| Accession | Gene ID  | Description                                                  | MW [kDa] | # Peptides | Coverage (%) |
| P01771    |          | Ig heavy chain V-III region HIL                              | 13.6     | 1          | 9.1          |
| P06703    | S100A6   | Protein S100-A6                                              | 10.2     | 1          | 7.8          |
| Q6IQ22    | RAB12    | Ras-related protein Rab-12                                   | 27.2     | 1          | 4.5          |
| O75792    | RNASEH2A | Ribonuclease H2 subunit A                                    | 33.4     | 1          | 2.7          |
| Q13103    | SPP2     | Secreted phosphoprotein 24                                   | 24.3     | 1          | 6.2          |
| P26927    | MST1     | Hepatocyte growth factor-like protein                        | 80.3     | 1          | 2.0          |
| Q05707    | COL14A1  | Collagen alpha-1(XIV) chain                                  | 193.4    | 1          | 1.2          |
| P07237    | P4HB     | Protein disulfide-isomerase                                  | 57.1     | 1          | 5.9          |
| Q7Z5L7    | PODN     | Podocan                                                      | 68.9     | 1          | 2.6          |
| Q15084    | PDIA6    | Protein disulfide-isomerase A6                               | 48.1     | 1          | 5.5          |
| P30041    | PRDX6    | Peroxiredoxin-6                                              | 25.0     | 1          | 5.4          |
| P14649    | MYL6B    | Myosin light chain 6B                                        | 22.8     | 1          | 6.3          |
| P14174    | MIF      | Macrophage migration inhibitory factor                       | 12.5     | 1          | 9.6          |
| Q9BQB4    | SOST     | Sclerostin                                                   | 24.0     | 1          | 8.5          |
| Q14533    | KRT81    | Keratin, type II cuticular Hb1                               | 54.9     | 1          | 2.2          |
| P01031    | C5       | Complement C5                                                | 188.2    | 1          | 0.6          |
| P62750    | RPL23A   | 60S ribosomal protein L23a                                   | 17.7     | 1          | 8.3          |
| P02511    | CRYAB    | Alpha-crystallin B chain                                     | 20.1     | 1          | 4.6          |
| P45877    | PPIC     | Peptidyl-prolyl cis-trans isomerase C                        | 22.7     | 1          | 3.8          |
| P83110    | HTRA3    | Serine protease HTRA3                                        | 48.6     | 1          | 3.1          |
| P55058    | PLTP     | Phospholipid transfer protein                                | 54.7     | 1          | 2.2          |
| P08311    | CTSG     | Cathepsin G                                                  | 28.8     | 1          | 7.1          |
| P27105    | STOM     | Erythrocyte band 7 integral membrane protein                 | 31.7     | 1          | 4.2          |
| P61353    | RPL27    | 60S ribosomal protein L27                                    | 15.8     | 1          | 6.6          |
| Q6NUN7    | C11orf63 | Uncharacterized protein C11orf63                             | 88.5     | 1          | 1.4          |
| P40925    | MDH1     | Malate dehydrogenase, cytoplasmic                            | 36.4     | 1          | 3.6          |
| P07910    | HNRNPC   | Heterogeneous nuclear ribonucleoproteins C1/C2               | 33.7     | 1          | 3.9          |
| P15531    | NME1     | Nucleoside diphosphate kinase A                              | 17.1     | 1          | 11.2         |
| P35637    | FUS      | RNA-binding protein FUS                                      | 53.4     | 1          | 3.0          |
| Q9Y2Q0    | ATP8A1   | Probable phospholipid-transporting ATPase IA                 | 131.3    | 1          | 0.6          |
| O15230    | LAMA5    | Laminin subunit alpha-5                                      | 399.5    | 1          | 0.3          |
| P46093    | GPR4     | G-protein coupled receptor 4                                 | 41.0     | 1          | 1.9          |
| Q9UKB5    | AJAP1    | Adherens junction-associated protein 1                       | 44.5     | 1          | 6.1          |
| P26373    | RPL13    | 60S ribosomal protein L13                                    | 24.2     | 1          | 6.2          |
| Q86VQ1    | GLCC1    | Glucocorticoid-induced transcript 1 protein                  | 58.0     | 1          | 2.4          |
| P17936    | IGFBP3   | Insulin-like growth factor-binding protein 3                 | 31.7     | 1          | 2.7          |
| Q8N976    | LOC4687  | Putative uncharacterized protein FLJ38264                    | 14.9     | 1          | 10.6         |
| P00966    | ASS1     | Argininosuccinate synthase                                   | 46.5     | 1          | 3.2          |
| P17931    | LGALS3   | Galectin-3                                                   | 26.1     | 1          | 4.4          |
| Q9NSB4    | KRT82    | Keratin, type II cuticular Hb2                               | 56.6     | 1          | 1.9          |
| Q03692    | COL10A1  | Collagen alpha-1(X) chain                                    | 66.1     | 1          | 2.8          |
| P48634    | PRRC2A   | Protein PRRC2A                                               | 228.7    | 1          | 0.8          |
| P08133    | ANXA6    | Annexin A6                                                   | 75.8     | 1          | 2.2          |
| Q6ZWJ8    | KCP      | Kielin/chordin-like protein                                  | 159.8    | 1          | 0.8          |
| O75594    | PGLYRP1  | Peptidoglycan recognition protein 1                          | 21.7     | 1          | 11.7         |
| Q7Z2Z2    | EFTUD1   | Elongation factor Tu GTP-binding domain-containing protein 1 | 125.4    | 1          | 0.7          |
| P40227    | CCT6A    | T-complex protein 1 subunit zeta                             | 58.0     | 1          | 4.0          |
| P36578    | RPL4     | 60S ribosomal protein L4                                     | 47.7     | 1          | 2.8          |
| Q8IZC6    | COL27A1  | Collagen alpha-1(XXVII) chain                                | 186.8    | 1          | 2.4          |
| P62861    | FAU      | 40S ribosomal protein S30                                    | 6.6      | 1          | 16.9         |
| P06316    |          | Ig lambda chain V-I region BL2                               | 13.6     | 1          | 6.2          |
| Q8NBJS    | COLGALT1 | Procollagen galactosyltransferase 1                          | 71.6     | 1          | 1.4          |
| P62917    | RPL8     | 60S ribosomal protein L8                                     | 28.0     | 1          | 6.2          |
| O60840    | CACNA1F  | Voltage-dependent L-type calcium channel subunit alpha-1F    | 220.5    | 1          | 1.0          |
| P62158    | CALM3    | Calmodulin                                                   | 16.8     | 1          | 11.4         |
| P56696    | KCNQ4    | Potassium voltage-gated channel subfamily KQT member 4       | 77.1     | 1          | 1.7          |

| P41229    | KDM5C    | Lysine-specific demethylase 5C      | 175.6       | 1          | 1.3             |
|-----------|----------|-------------------------------------|-------------|------------|-----------------|
| Accession | Gene ID  | Description                         | MW<br>[kDa] | # Peptides | Coverage<br>(%) |
| P03952    | KLKB1    | Plasma kallikrein                   | 71.3        | 1          | 1.6             |
| Q8ND61    | C3orf20  | Uncharacterized protein C3orf20     | 101.2       | 1          | 1.2             |
| O60844    | ZG16     | Zymogen granule membrane protein 16 | 18.2        | 1          | 5.4             |
| P35613    | BSG      | Basigin                             | 42.2        | 1          | 4.7             |
| Q8N655    | C10orf12 | Uncharacterized protein C10orf12    | 137.1       | 1          | 2.9             |
| Q8N474    | SFRP1    | Secreted frizzled-related protein 1 | 35.4        | 1          | 5.1             |

**Table S5. MS1 precursor ions for clusterin protein**

| Protein   | Peptide selected        | Charge | Precursor m/z | [M+1] m/z | [M+2] m/z | Xcorr | Percolator PEP |
|-----------|-------------------------|--------|---------------|-----------|-----------|-------|----------------|
| P10909    | TLLSNLEEK               | 2      | 559.31        | 559.81    | 560.31    | 2.95  | 5.47E-04       |
| Clusterin | ASSIIDELFQDR            | 2      | 697.35        | 697.85    | 698.35    | 3.91  | 1.04E-05       |
|           | LANLTQGEDQYYLR          | 2      | 842.42        | 842.92    | 843.42    | 4.88  | 7.57E-07       |
|           | VTTVASHTSDSDVPSGVTEVVVK | 3      | 1157.59       | 1158.09   | 1158.60   | 3.79  | 6.07E-07       |
|           | LFSDPITVTVPEVSR         | 2      | 937.50        | 938.00    | 938.50    | 3.63  | 8.75E-09       |
